1 **Conserved bacterial genomes from two geographically distinct peritidal**  
2 **stromatolite formations shed light on potential functional guilds**

3

4 Running Title: Functional bacterial guilds in stromatolites

5

6 Samantha C. Waterworth<sup>a</sup>, Eric W. Isemonger<sup>b</sup>, Evan R. Rees<sup>a</sup>, Rosemary A.  
7 Dorrington<sup>b</sup> and Jason C. Kwan<sup>a#</sup>

8 <sup>a</sup> Division of Pharmaceutical Sciences, University of Wisconsin, 777 Highland Ave.,  
9 Madison, Wisconsin 53705, USA

10 <sup>b</sup> Department of Biochemistry and Microbiology, Rhodes University, Grahamstown,  
11 South Africa

12 #Corresponding author. Email: [jason.kwan@wisc.edu](mailto:jason.kwan@wisc.edu); Phone: 608-262-3829

13

14 **ORIGINALITY-SIGNIFICANCE**

15 Peritidal stromatolites are unique among stromatolite formations as they grow at the  
16 dynamic interface of calcium carbonate-rich groundwater and coastal marine waters.

17 The peritidal space forms a relatively unstable environment and the factors that  
18 influence the growth of these peritidal structures is not well understood. To our

19 knowledge, this is the first comparative study that assesses species conservation within

20 the microbial communities of two geographically distinct peritidal stromatolite  
21 formations. We assessed the potential functional roles of these communities using

22 genomic bins clustered from metagenomic sequencing data. We identified several

23 conserved bacterial species across the two sites and hypothesize that their genetic

24 functional potential may be important in the formation of peritidal stromatolites. We  
25 contrasted these findings against a well-studied site in Shark Bay, Australia and show  
26 that, unlike these hypersaline formations, archaea do not play a major role in peritidal  
27 stromatolite formation. Furthermore, bacterial nitrogen and phosphate metabolisms of  
28 conserved species may be driving factors behind lithification in peritidal stromatolites.

29

### 30 **SUMMARY**

31 Stromatolites are complex microbial mats that form lithified layers and ancient forms are  
32 the oldest evidence of life on earth, dating back over 3.4 billion years. Modern  
33 stromatolites are relatively rare but may provide clues about the function and evolution  
34 of their ancient counterparts. In this study, we focus on peritidal stromatolites occurring  
35 at Cape Recife and Schoenmakerskop on the southeastern South African coastline.  
36 Using assembled shotgun metagenomic data we obtained 183 genomic bins, of which  
37 the most dominant taxa were from the Cyanobacteriia class (Cyanobacteria phylum),  
38 with lower but notable abundances of bacteria classified as Alphaproteobacteria,  
39 Gammaproteobacteria and Bacteroidia. We identified functional gene sets in bacterial  
40 species conserved across two geographically distinct stromatolite formations, which  
41 may promote carbonate precipitation through the reduction of nitrogenous compounds  
42 and possible production of calcium ions. We propose that an abundance of extracellular  
43 alkaline phosphatases may lead to the formation of phosphatic deposits within these  
44 stromatolites. We conclude that the cumulative effect of several conserved bacterial  
45 species drives accretion in these two stromatolite formations.

46

## 47 INTRODUCTION

48 Stromatolites are organo-sedimentary structures that date back more than 3.4 billion  
49 years, forming the oldest fossils of living organisms on Earth (Dupraz *et al.*, 2009). A  
50 more recent discovery of stromatolite-like structures in Greenland suggests that the  
51 structures may date as far back as 3.7 - 3.8 billion years (Nutman *et al.*, 2016),  
52 however, their biogenic origin remains under debate (Witze, 2016). The emergence of  
53 Cyanobacteria in stromatolites approximately 2.3 billion years ago initiated the Great  
54 Oxygenation Event that fundamentally altered the Earth's redox potential and resulted in  
55 an explosion of oxygen-based and multicellular biological diversity (Soo *et al.*, 2017).  
56 Ancient stromatolites could provide insight into how microorganisms shaped early  
57 eukaryotic evolution. Unfortunately ancient microbial mats are not sufficiently preserved  
58 for identification of these microbes and individual bacteria cannot be classified more  
59 specifically than phylum Cyanobacteria due to morphological conservatism (Awramik,  
60 1992; Dupraz *et al.*, 2009). The study of extant stromatolite analogs may therefore help  
61 to elucidate the biological mechanisms that led to the formation and evolution of their  
62 ancient ancestors. Modern stromatolites are formed through a complex combination of  
63 both biotic and abiotic processes. The core process revolves around the carbon cycle  
64 where bacteria transform inorganic carbon into bioavailable organic carbon for  
65 respiration. Bacterial respiration in turn results in the release of inorganic carbon, which,  
66 under alkaline conditions, will bind cations and precipitate primarily as calcium  
67 carbonate (Dupraz *et al.*, 2009). This carbonate precipitate, along with sediment grains,  
68 can then become trapped within bacterial biofilms forming the characteristic lithified  
69 layers.

70

71 Alteration of the pH and subsequently, the solubility index (SI), may promote  
72 mineralization or dissolution of carbonate minerals through microbial cycling of redox  
73 sensitive compounds such as phosphate, nitrogen, sulfur and other nutrients within the  
74 biofilm. This in turn regulates the rate of carbonate accretion and stromatolite growth.  
75 Particularly, photosynthesis and sulfate reduction have been demonstrated to increase  
76 alkalinity thereby promoting carbonate accretion, resulting in the gradual formation of  
77 lithified mineral layers (Dupraz *et al.*, 2009). In some stromatolite formations such as  
78 those of Shark Bay, Australia, there is abundant genetic potential for both dissimilatory  
79 oxidation of sulfur (which may promote dissolution under oxic conditions and  
80 precipitation under anoxic conditions) and dissimilatory reduction of sulfate (which  
81 promotes precipitation) (Gallagher *et al.*, 2012; Casaburi *et al.*, 2016; Wong *et al.*,  
82 2018).

83

84 The biogenicity of stromatolites has been studied extensively in the hypersaline and  
85 marine formations of Shark Bay, Australia and Exuma Cay, Bahamas, respectively  
86 (Khodadad and Foster, 2012; Babilonia *et al.*, 2018). The presence of Archaea has  
87 been noted in several microbial mat and stromatolite systems (Casaburi *et al.*, 2016;  
88 Balci *et al.*, 2018; Medina-Chávez *et al.*, 2019), particularly in the stromatolites of Shark  
89 Bay, where they are hypothesized to potentially fulfill the role of nitrifiers and  
90 hydrogenotrophic methanogens (Wong *et al.*, 2017). Although Cyanobacteria,  
91 Proteobacteria and Bacteroidetes appear to be abundant in both marine and  
92 hypersaline systems, Cyanobacteria are proposed to be particularly vital to these

93 formations through the combined effect of biofilm formation, carbon fixation, nitrogen  
94 fixation and endolithic (boring) activity (Macintyre *et al.*, 2000; Khodadad and Foster,  
95 2012; Casaburi *et al.*, 2016; Babilonia *et al.*, 2018).

96

97 Peritidal tufa stromatolite systems are found along the southeastern coastline of South  
98 Africa (SA). They are geographically isolated, occurring at coastal dune seeps  
99 separated by stretches of coastline (Smith *et al.*, 2018). In these systems, stromatolite  
100 formations extend from freshwater to intertidal zones and are dominated by  
101 Cyanobacteria, Bacteroidetes and Proteobacteria (Perissinotto *et al.*, 2014). The  
102 stromatolites are impacted by fluctuating environmental pressures caused by periodic  
103 inundation by seawater, which affects the nutrient concentrations, temperature and  
104 chemistry of the system (Rishworth *et al.*, 2016). These formations are characterized by  
105 their proximity to the ocean, where stromatolites in the upper formations receive  
106 freshwater from the inflow seeps, middle formation stromatolites withstand a mix of  
107 freshwater seepage and marine over-topping, and lower formations are in closest  
108 contact with the ocean (Perissinotto *et al.*, 2014). The stromatolite formations at Cape  
109 Recife and Schoenmakerskop are exposed to both fresh and marine water that has little  
110 dissolved inorganic phosphate and decreasing levels of dissolved inorganic nitrogen  
111 (Cape Recife: 82 - 9  $\mu\text{M}$ , Schoenmakerskop: 424 - 14  $\mu\text{M}$ ) moving from freshwater to  
112 marine influenced formations (Rishworth, Perissinotto, Bird, *et al.*, 2017). Microbial  
113 communities within these levels therefore likely experience distinct environmental  
114 pressures, including fluctuations in salinity and dissolved oxygen (Rishworth *et al.*,  
115 2016). While carbon predominantly enters these systems through cyanobacterial carbon

116 fixation, it is unclear how other members of the stromatolite-associated bacterial  
117 consortia influence mineral stratification resulting from the cycling of essential nutrients  
118 such as nitrogen, phosphorus and sulfur. Since peritidal stromatolites exist in constant  
119 nutritional and chemical flux with varying influence from the fresh and marine water  
120 sources, they present an almost ideal *in situ* testing ground for investigating which  
121 microbes are consistently present despite fluctuations in their environment. Identification  
122 of conserved bacterial species across both time and space and across varied  
123 environmental pressures would suggest that these bacteria are not only robust but likely  
124 play important roles within the peritidal stromatolite consortia.

125

126 Previous studies of stromatolites collected from Lake Clifton, Pavilion Lake, Clinton  
127 Creek, Highborne Cay and Pozas Azules have investigated the overall bacterial  
128 composition using 16S rRNA gene analysis and/or overall potential gene function of  
129 unbinned metagenomic datasets per bacterial taxa using tools such as MG-RAST  
130 (Keegan *et al.*, 2016) to gain insight into the potential roles of the different bacterial  
131 groups (Mobberley *et al.*, 2015; Centeno *et al.*, 2016; Gleeson *et al.*, 2016; Ruvindy *et*  
132 *al.*, 2016; Warden *et al.*, 2016; White *et al.*, 2016). However, the presence of all genes  
133 required for a complete functional pathway within a collection of bacteria does not  
134 necessarily mean that the cycle can take place since they may not be present within a  
135 single organism. Therefore, in order to assess the potential for functional roles,  
136 individual bacterial genomes must be investigated. To date, only two studies have  
137 successfully binned individual bacterial genomes from culture-independent,  
138 metagenomic data originating from stromatolites from Shark Bay (Australia) (Wong *et*

139 *al.*, 2018) and Socompa Lake (Argentina) (Kurth *et al.*, 2017). The latter study obtained  
140 four high-quality bins (in accordance with MIMAG standards defined by (Bowers *et al.*,  
141 2017)) and analyzed three which were believed to have carried genes from several  
142 closely-related genomes. Extracted 16S rRNA sequences were in conflict with whole-  
143 genome taxonomic classifications (Kurth *et al.*, 2017). The Shark Bay study obtained a  
144 total of 550 binned genomes, of which 87 (15.8%) were of medium to high quality  
145 (Bowers *et al.*, 2017; Wong *et al.*, 2018) and the data provided information on a number  
146 of potentially important processes that may contribute to the formation and maintenance  
147 of the hypersaline stromatolites. However, the study did not identify key microbial  
148 architects within these biogenic structures.

149

150 Using a metagenomic approach, we have sought to gain insight into the foundational  
151 bacteria responsible for metabolic processes that potentially result in formation of  
152 peritidal South African stromatolites. We obtained and annotated 183 putative bacterial  
153 metagenome-assembled genomes (MAGs), (of which 112 (61%) were of medium to  
154 high quality) from samples of two geographically isolated sites near Port Elizabeth,  
155 South Africa. We identified several temporally and spatially conserved bacterial species  
156 and functional gene sets, that are likely central in establishing and maintaining peritidal  
157 stromatolite microbial communities.

158

## 159 **RESULTS AND DISCUSSION**

160 Two geographically isolated peritidal stromatolite sites, Cape Recife and  
161 Schoenmakerskop, which are 2.82 km apart, were chosen for this study. These two

162 sites have been extensively characterized with respect to their physical structure,  
163 nutrient and chemical environment (Perissinotto *et al.*, 2014; Rishworth *et al.*, 2016,  
164 2019; Rishworth, Perissinotto, Bornman, *et al.*, 2017; Dodd *et al.*, 2018). The sites  
165 experience regular shifts in salinity due to tidal overtopping and groundwater seepage  
166 (Rishworth *et al.*, 2019). Comparison to a site with groundwater seepage but no  
167 stromatolite growth, has shown that the growth of peritidal stromatolites is promoted  
168 within this region by decreased levels of wave action, higher water alkalinity and  
169 decreased calcite and aragonite saturation (Dodd *et al.*, 2018). Furthermore,  
170 stromatolite growth is inhibited by increased levels of salinity, as lithified structures are  
171 not observed in both the marine waters and in deeper portions of formation pools, with  
172 higher salinity levels (Dodd *et al.*, 2018).

173  
174 Stromatolite formations at both sites begin at a freshwater inflow and end before the  
175 subtidal zone (Fig. 1) and are exposed to different levels of tidal disturbance. Samples  
176 for this study were collected from the upper stromatolites at Cape Recife and  
177 Schoenmakerskop in January and April 2018 for comparisons over time and geographic  
178 space. Additional samples were collected in April 2018 from middle and lower  
179 formations for extended comparison across the two sites (Fig. 1). For a detailed  
180 perspective of depth and the differentiation of the sampled zones a 3-dimensional  
181 rendering of the sample sites was constructed by a 3rd party (Caelum Technologies<sup>®</sup>)  
182 using a combination of drone-based photogrammetry and geographic mapping using  
183 differential GPS (Fig. 1). Stromatolite formations were classified according to their tidal  
184 proximity as defined in previous studies (Perissinotto *et al.*, 2014; Rishworth *et al.*,



185 2016; Rishworth, Perissinotto, Bornman, *et al.*, 2017; Dodd *et al.*, 2018). Upper  
186 formations occur in the supratidal zone where they are constantly exposed to fresh  
187 water flowing from dune seeps. These formations will only be exposed to seawater  
188 during spring tides or extreme storm surges. The water from upper formations feeds into  
189 large pools, which in turn feed into the lower portion of the system. In the upper-middle  
190 intertidal zone, the formations form a slope into large pools where they will only receive  
191 seawater during peak high tide. Lower formations occur in areas where saline or  
192 brackish conditions are predominant. In Schoenmakerskop the lower zone is located in  
193 a semi stagnant pool which is frequently overtopped, whilst in the lower zone of Cape  
194 Recife, formations create a low flowing slope which ends at the subtidal zone. All  
195 sampling was conducted at low tide. Sample abbreviations and MAG prefixes used  
196 throughout this study correspond to the site and region from which they were sampled  
197 e.g. “SU” identifies the sample as originating from Schoenmakerskop, Upper formation  
198 in April (Table S1). Samples prefixed with a “C” identify samples collected in January  
199 e.g. “CSU” identifies the sample as originating from Schoenmakerskop, Upper formation  
200 in January (Table S1).

201

## 202 **Phylogenetic distribution of microbial communities**

203 We assessed the diversity and structure of the bacterial communities in triplicate  
204 samples taken from upper, middle and lower formations at Cape Recife and  
205 Schoenmakerskop using 16S rRNA gene amplicon sequence analysis. All communities  
206 were dominated by Cyanobacteria, Bacteroidetes, Alphaproteobacteria,  
207 Gammaproteobacteria and other unclassified bacteria (Fig. 2A), in agreement with a

208 previous study at Schoenmakerskop (Perissinotto *et al.*, 2014). Bacterial communities at  
209 each sampling site were statistically different from one another (Fig. 2B; ANOSIM: R =  
210 0.976,  $p = 0.01$  permutations = 999), whilst pairwise Kendall rank correlation tests  
211 showed that replicates were not statistically different from one another (pairwise  $p$ -  
212 values  $< 2.2 \times 10^{-16}$ ).

213

### 214 **Trends observed in metagenomes of stromatolite samples from Cape Recife and** 215 **Schoenmakerskop**

216 To characterize the metabolic potential within stromatolites, we generated shotgun  
217 metagenomic libraries from 8 samples representative of the upper, middle and lower  
218 formations at both sites in April 2018, as well as an additional two samples from the  
219 upper formations of each site, collected 4 months previously in January 2018 (Table  
220 S1). Following assembly of raw sequence reads, gene coverages were normalized to  
221 the length-weighted average coverage per sample, revealing a high abundance of  
222 genes encoding phosphate transport (*pstSCAB*), phosphate uptake regulation  
223 (*phoURBP*) and alkaline phosphatases (*phoADX*) were observed across the board (Fig.  
224 3). Additionally, genes involved in phosphonate metabolism (*phnCDEFGHIJKLM*) were  
225 abundant in three of the four middle formations but were absent in upper formations.  
226 The concentration of soluble phosphorus, although relatively low, is highest in water  
227 surrounding the middle formations, as both fresh seep water and ocean overtopping  
228 contribute to the total phosphate (Dodd *et al.*, 2018). It is thus unsurprising then, that the  
229 greatest abundance of phosphate-metabolism genes are found in the middle  
230 formations. The high abundance of genes encoding phosphate-metabolizing enzymes,

231 may also be indicative of how stromatolite communities cope with low dissolved  
232 inorganic phosphorus in their environment. Genes encoding alkaline phosphatase  
233 *phoX*, were the most abundant among the phosphatases observed in these stromatolite  
234 samples, and represent a calcium-dependent enzyme that can function at low substrate  
235 concentrations on a broad range of C-O-P substrates (Zaheer *et al.*, 2009). The  
236 phosphonate transporter genes (*phnCDE*) are more prevalent than the genes encoding  
237 the C-P lyase (*phnGHIJLM*) required for phosphonate degradations (Fig. 3). These  
238 transporters have also been implicated in the transport of inorganic phosphate, in  
239 addition to phosphonates (Stasi *et al.*, 2019), and the discrepancy between transporters  
240 and metabolic genes may suggest an additional role of phosphate uptake in these  
241 systems. Overall gene abundances indicated negligible presence of canonical  
242 dissimilatory sulfate reduction/oxidation via *aprAB* and *dsrAB* encoded enzymes.  
243 Similarly, there were low abundances of genes associated with sulfonate metabolism.  
244 There was an abundance of genes associated with assimilatory sulfate reduction, but  
245 the low abundance or absence of *cysC*, a gene encoding a key enzyme in this pathway,  
246 indicated that this pathway may not be complete. Genes associated with assimilatory  
247 nitrate reduction (*narB*, *nirA*) were the most prevalent markers of nitrogen metabolism.  
248 All sites also contained a number of genes associated with dissimilatory nitrate  
249 reduction where cytoplasmic NADH-dependent nitrate reductase *nirBD* appeared to be  
250 favored over periplasmic cytochrome c nitrate reductase *nrfAH*. Interestingly nitrogen  
251 fixation genes (*nifDHK*) appear to be more abundant in the middle stromatolite  
252 formations of Schoenmakerskop (Fig. 3).

253

## 254 **Binning and phylogenetic classification of putative genomes**

255 The 10 assembled metagenomes were binned using Autometa (Miller *et al.*, 2019),  
256 resulting in a total of 183 bacterial genome bins (Table S1). Using relative coverage per  
257 sample as a proxy for abundance, we found that genomes classified within the  
258 Cyanobacteria class were consistently dominant in all collection points, while  
259 Alphaproteobacteria, Gammaproteobacteria and Bacteroidia were less abundant but  
260 notable bacterial classes (Fig. 4A). This distribution appears to be approximately  
261 congruent with abundances observed in the 16S rRNA gene amplicon analyses (Fig. 2).

262

## 263 **Temporal and spatial conservation of bacterial species**

264 We calculated pairwise average nucleotide identity (ANI) between all binned genomes  
265 and defined conserved species as genomes sharing more than 97% ANI in two or more  
266 of the sampled regions. We identified 16 conserved taxa across the 10 sampled  
267 regions, with several species identified in 3 - 5 samples, across Schoenmakerskop and  
268 Cape Recife, however no single species was common to all sampled sites (Table S2,  
269 Fig. 4A). Conserved species were commonly the most abundant taxa present in each of  
270 the samples, accounting for approximately 30 - 80% of the species abundance (Table  
271 S2, Fig. 4A). Cyanobacterial species within the *Acaryochloris* and *Hydrococcus* genera  
272 and Absconditabacterales family were conserved across upper formations (Table 1, Fig.  
273 4B, Table S3). Seven other species were conserved across the middle formations,  
274 including species classified within the *Rivularia* genus and Phormidesmiaceae and  
275 Spirulinaceae families (Table 1 and S3, Fig. 4B). Two distinct species within family  
276 Elainellaceae were also conserved: species A was detected only in the upper pools of

277 Cape Recife, whilst species B was conserved across the middle formations of both sites  
278 (Table 1 and S3, Fig. 4B).

279

280 Also, of interest was the presence of conserved bacterial species (order  
281 Absconditabacterales), which are classified under the Patescibacteria phylum.  
282 Patescibacteria are unusually small bacteria found in groundwater that produce large  
283 surface proteins hypothesized to help them attach to, and exploit the ability of other  
284 microorganisms performing nitrogen, sulfur and iron cycling (Herrmann *et al.*, 2019).  
285 The presence of these conserved bacteria suggests that the inflow water seeps may  
286 originate from groundwater.

287

288 Conserved *Rivularia*, Elainellaceae, Phormidesmiaceae and Chloroflexaceae species  
289 were identified in the lower formation of Schoenmakerskop, but none of the genomes  
290 identified in the lower formation of Cape Recife had greater than 97% shared ANI with  
291 any other genome bin. The distribution of conserved taxa, wherein the upper and middle  
292 formations appear to harbor distinct conserved taxa suggests that the differing nutrient  
293 and physical characteristics between upper, middle and lower regions of the  
294 stromatolite formation elicit specialization of the conserved bacterial community. The  
295 lack of conserved bacterial species across the lower formation of Cape Recife may be  
296 due to the choice of sampling site: The lower formation sample taken from Cape Recife  
297 is in closer contact with the ocean than the lower formation sample taken from  
298 Schoenmakerskop (Fig. 1 C - D). The proximity of the Schoenmakerskop lower  
299 formation sample to the ocean was initially thought to be sufficient to delimit it as a

300 lower formation, but following this study it may be reclassified as a middle formation, as  
301 the bacterial community composition corresponds more closely with the other four  
302 middle formation samples (Fig. 4B).

303

### 304 **Metabolic potential of binned genomes**

305 Oxygenic photosynthesis by cyanobacteria results in rapid fixation of carbon dioxide  
306 and an increase in alkalinity (Pace *et al.*, 2018). Carbonate ions bind cations such as  
307 calcium and are precipitated under alkaline conditions, promoting the growth of  
308 stromatolite structures (Dupraz *et al.*, 2009). Given their numerical dominance in Cape  
309 Recife and Schoenmakerskop stromatolites, and their predicted role in other  
310 stromatolites (Dupraz *et al.*, 2009), cyanobacteria likely perform carbon sequestration.  
311 However, the identity of the bacteria that cycle redox-sensitive sulfur, phosphate,  
312 nitrogen and calcium, and subsequently affect the alkalinity and solubility index enabling  
313 carbonate precipitation in these stromatolites remains unknown. We inspected  
314 PROKKA and KEGG annotations within all stromatolite-associated bacterial genome  
315 bins to identify potential metabolic pathways that may promote mineral deposition and  
316 accretion (Dupraz *et al.*, 2009). The results presented here are summarized in Table 1.

317

318 *Sulfur metabolism.* Reduction of sulfate has previously been shown to promote the  
319 precipitation of carbonates in the form of micritic crusts in Bahamian and Australian  
320 stromatolites (Reid *et al.*, 2000; Wong *et al.*, 2018) and it has been suggested that  
321 microbial cycling of sulfur played an important role in ancient Australian stromatolites,  
322 even prior to the emergence of Cyanobacteria (Bontognali *et al.*, 2012; Allen, 2016).

323 Amongst the Cape Recife and Schoenmakerskop stromatolite-associated bacteria, the  
324 potential capacity for sulfate reduction was confined to only a few genomes (Fig. 5 and  
325 Fig. S1). The complete set of genes required for assimilatory sulfate reduction  
326 (*sat/met3*, *cysC*, *cysH* and *sir* genes) (Santos *et al.*, 2015) were recovered in four  
327 genomes (Fig. S1), three of which were conserved *Acaryochloris* species (Fig. 5). The  
328 abundance of genes associated with assimilatory sulfate reduction in the conserved  
329 *Acaryochloris* genome bins accounted for 22 - 100% of gene counts observed in their  
330 respective metagenomes (Fig.5). This was calculated as abundance of geneX in binX,  
331 as a percentage of geneX abundance in the sample from which the bin was derived  
332 (Fig. 5). The greatest abundance genes for uptake and desulfonation of  
333 alkanesulfonates (*ssuABCDE*) (Aguilar-Barajas *et al.*, 2011; Ellis, 2011) were detected  
334 exclusively in conserved *Hydrococcus* species (Fig. 5), which account for 23 - 100% of  
335 gene abundance in the respective metagenomes. All genes required for a complete  
336 pathway found exclusively in bin RU2\_2, but both SU\_1\_0 and CRU1\_1 appear to be  
337 missing the *ssuE* gene. The *ssuE* gene is not required for growth using aliphatic  
338 sulfonate or methionine substrates, but is required for arylsulfonate metabolism  
339 (Kahnert *et al.*, 2000). This suggests that these *Hydrococcus* strains are all capable of  
340 some form of sulfonate metabolism, but not all can metabolize arylsulfonates (Bin  
341 CSU\_1\_8 is only 37% complete, and therefore of low quality and may be missing gene  
342 due to incompleteness). In both cases, these trends are in agreement with the patterns  
343 observed in the metabolic potential of the overall metagenome (Fig.3). *Hydrococcus*  
344 and *Acaryochloris* species are dominant in upper formations (Fig. 4 and Table S3) and  
345 the potential for cumulative removal of hydrogen by sulfate reduction by these species

346 may aid in the creation of an alkaline environment within the system. Seep waters  
347 feeding both Cape Recife and Schoenmakerskop have relatively high levels of sulfate  
348 (Dodd *et al.*, 2018), and it is possible that the *Hydrococcus* and *Acaryochloris* species  
349 utilize this nutrient in the upper formations (closest to the seeps) as a selective  
350 advantage, simultaneously increasing the alkalinity of the surrounding environment  
351 through hydrogen assimilation. There was no evidence for the potential for dissimilatory  
352 sulfate reduction in conserved genome bins (Fig. 5). Similarly, amongst all 183 genome  
353 bins, only genomes representative of a *Thioiplota* sp. from the Schoenmakerskop lower  
354 formation and a *Desulfobacula* sp. from the Schoenmakerskop middle formation  
355 included all genes required for dissimilatory sulfate reduction (Fig. S1). The lack of  
356 genes associated with conserved or dominant bacterial taxa in the middle and lower  
357 pools suggest that either sulfate is not required by the consortia that inhabit the  
358 middle/lower formations and is required only by bacteria exposed to ground water, or  
359 that insufficient amounts of the sulfate continues into the lower pools where the middle  
360 and lower formations are found. This suggests that calcite formation in these peritidal  
361 stromatolites may be influenced by processes other than dissimilatory sulfate reduction,  
362 in contrast to stromatolite formations in the Cayo Coco lagoonal network, Highborne  
363 Cay and Eleuthera Island in the Bahamas (Visscher *et al.*, 2000; Dupraz *et al.*, 2004;  
364 Pace *et al.*, 2018).

365

366 *Nitrogen metabolism.* The reduction of nitrogen, nitrates and nitrites can lead to calcite  
367 precipitation (Rodriguez-Navarro *et al.*, 2003; Wei *et al.*, 2015; Konopacka-Łyskawa *et*  
368 *al.*, 2017; Wong *et al.*, 2018; Lee and Park, 2019), and the released NH<sub>3</sub> can react with



369 CO<sub>2</sub> and H<sub>2</sub>O, to form 2NH<sup>4+</sup> + CO<sub>3</sub><sup>2-</sup> (Konopacka-Łyskawa *et al.*, 2017). Nitrogen  
370 metabolism is proposed to have emerged at approximately the same time as sulfur  
371 metabolism, dated to 3.4 billion years ago (Stüeken, 2016), as both processes share  
372 similar redox states (Thomazo *et al.*, 2011), and ammonium availability during this time  
373 may have sustained developing microbial life (Yang *et al.*, 2019). Therefore, bacteria  
374 that can fix nitrogen or produce ammonia from nitrates/nitrites could potentially promote  
375 the growth of stromatolites (Visscher and Stolz, 2005) and may have added to the  
376 formation of ancient analogs. Similarly, denitrification will likely lead to mineral  
377 dissolution and retardation of stromatolite growth (Visscher and Stolz, 2005). We found  
378 that several conserved bacteria carried the genes associated with ferredoxin-dependent  
379 assimilatory nitrate reduction (*nirA-narB* genes) (Moreno-Vivián *et al.*, 1999), nitrogen  
380 fixation (*nifDHK* genes) and dissimilatory nitrite reduction (*nirBD* genes) (Griffith, 2016),  
381 all of which result in the production of ammonia (Fig. 5).

382  
383 The potential for assimilatory nitrate reduction was detected in several genomes,  
384 primarily from the middle formations, with particularly high gene abundances of *nirA-*  
385 *narB* genes conserved *Rivularia* sp. (Fig. 5), which are the dominant species in the  
386 middle formations (Fig. 4). The potential for dissimilatory reduction of nitrites, via either  
387 cytoplasmic *nirBD* or membrane-bound *nrfAH* nitrite reductases, was detected in  
388 several genomes across both the upper and middle formations (Fig. S1). It appears that  
389 the gene abundances associated with assimilatory nitrate reduction in *Rivularia* sp.  
390 account for the majority (29 - 75%, Fig. 5) of *nirA-narB* genes observed in their  
391 respective metagenomes (Fig. 3). Among conserved bacteria, the potential for

392 dissimilatory nitrate reduction is relatively low, with *Hydrococcus* sp. carrying the  
393 greatest abundance of *nirBD* genes (Fig. 5) which encode cytoplasmic nitrite  
394 reductases. Non-conserved *Thioploca*, *Cyclobacteriaceae* and *Limnothrix* species  
395 appear to account for the remainder of the *nirBD* genes observed in their respective  
396 metagenomes (Fig. S1). Very few genomes included the *nrfAH* genes which encode  
397 membrane-bound nitrite reductases.

398

399 Nighttime nitrogen fixation has previously been shown to be a driver of carbonate  
400 precipitation in stromatolites (Dupraz *et al.*, 2009) and *nif* genes were identified in  
401 several conserved bacteria associated with both upper and middle formations:  
402 *Hydrococcus* species across both upper formations, *Microcoleus* in the  
403 Schoenmakerskop upper formations and Phormidiaceae, Spirulinaceae and  
404 Chloroflexaceae species the middle formations (Fig. 5). In addition to the conserved  
405 bacteria carrying *nif* genes, non-conserved *Blastochloris* species appeared to account  
406 for the majority (10% - 75%) of identified *nifDHK* genes (Fig. S1). The genetic capacity  
407 for nitrogen fixation being retained in Schoenmakerskop and Cape Recife was  
408 unexpected, given the high concentrations of dissolved inorganic nitrogen (DIN) ranging  
409 from 95 - 450 mM at the two sites (Rishworth *et al.*, 2016).

410

#### 411 **Phosphate and phosphonate metabolism**

412 Phosphatic structures that closely resemble fossilized phosphatic stromatolites have  
413 recently been observed within Cape Recife stromatolites (Buttner *et al.*, 2019,  
414 unpublished). Hydroxyapatite ( $\text{Ca}_5(\text{PO}_4)_3(\text{OH})$ ) is more easily precipitated than calcite

415 (CaCO<sub>3</sub>) and the release of PO<sub>4</sub><sup>3-</sup> into the biofilm by alkaline phosphatase activity could  
416 increase the potential for apatite mineralization, the rate of which may be increased in  
417 the presence of an alkaline environment (Gallagher *et al.*, 2013). Copies of alkaline  
418 phosphatase genes *phoD* and *phoX* are variable within bacterial genomes but the  
419 majority of bacteria carry only 1 copy of *phoD* and 1 copy of *phoX* (Ragot *et al.*, 2015,  
420 2017). Conserved *Acaryochloris* and *Rivularia* species were particularly notable as they  
421 encoded between 2–4 copies of *phoX* (Fig. 5), and carried all genes required for  
422 phosphate transport (*pstSCAB*) (Fig. 5). Since the Cape Recife and Schoenmakerskop  
423 stromatolites experience limited inorganic phosphate availability (Rishworth *et al.*, 2016,  
424 2018; Rishworth, Perissinotto, Bird, *et al.*, 2017; Dodd *et al.*, 2018), associated bacteria  
425 may generate bioavailable phosphate from trapped sediments in biofilms resulting in  
426 increased concentrations, similar to cyanobacteria living in phosphate-poor rivers  
427 (Wood *et al.*, 2015). An increase in both PO<sub>4</sub><sup>3-</sup> and Ca<sup>2+</sup> can result in rapid precipitation  
428 of apatite in marine phosphorites, freshwater lakes and in some soil bacteria (Danen-  
429 Louwerse *et al.*, 1995; Guang-Can *et al.*, 2008; Cosmidis *et al.*, 2015) and this could  
430 account for the phosphatic deposits observed within the SA stromatolites (Buttner *et al.*,  
431 2019, unpublished).

432

433 Finally, conserved *Rivularia* species in the middle and lower formations and other non-  
434 conserved bacterial species harbored the 11 genes required for the transport (*phnCDE*)  
435 and lysis (*phnFGHIJKLM*) of phosphonate compounds (Fig. 5) (Metcalf and Wanner,  
436 1993). Phosphonates are characterized by the presence of a carbon-phosphorus bond  
437 and are biosynthesized by many organisms (White and Metcalf, 2007). C-P lyase

438 (*phnGHIJLKM*) breaks the C-P bond within phosphonate substrates resulting in a  
439 hydrocarbon and inorganic phosphate (White and Metcalf, 2007). The inorganic  
440 phosphate may then be used within the bacterial cell or released aiding in accretion  
441 through increased ion concentration (Rott *et al.*, 2018). Conversely, phosphonates can  
442 prevent precipitation of calcite by binding to crystal growth sites (Kan *et al.*, 2005) and  
443 the degradation of these compounds within stromatolite formations may prevent  
444 chemical inhibition of stromatolite growth. Given the low availability of phosphate in  
445 these systems, phosphonates may also provide an auxiliary source of bioavailable  
446 phosphate. The potential for phosphonate degradation was also observed in 8 genomes  
447 from the Shark Bay stromatolites (Wong *et al.*, 2018). The conservation of phosphonate  
448 metabolism across stromatolites would indicate that these bacterial processes may be  
449 important within the generalized stromatolite system.

450

#### 451 **Archaeal genomes in Cape Recife and Schoenmakerskop stromatolites**

452 Genome-resolved studies of hypersaline stromatolites in Shark Bay revealed that a  
453 large proportion of the microbial community consisted of archaeal species (Wong *et al.*,  
454 2017, 2018). Scrutiny of the contigs from Cape Recife and Schoenmakerskop showed  
455 that none of the datasets comprised more than 1.5% archaeal genes. Assessment of  
456 contigs clustered into the Archaeal kingdom bins from the upper and middle formations  
457 showed little evidence for the presence of Archaea. However, two low-quality genomes  
458 were obtained from the two lower formations SL\_Arch\_1 and RL\_Arch\_2, which were  
459 classified as Woesearchaeales (order) and *Nitrosoarchaeum* (genus) respectively  
460 (Table S3). Alignment of the 16S rRNA gene obtained from SL\_Arch\_1 (Table S3)

461 against the nr database showed that it shared the greatest sequence homology with an  
462 uncultured archaeon clone GWA2 (87% identity). Similarly, analysis of the 16S rRNA  
463 gene sequence from RL\_Arch\_2 (Table S3) indicated that it shared greatest sequence  
464 homology with an uncultured archaeon clone 027 (99.79% identity). The coverage of  
465 these genomes is among the lowest in each of the lower formation samples (Table S3)  
466 and would suggest a low numerical abundance of these archaea. It is compelling that  
467 the only Archaea detected in this study are derived from the formations most influenced  
468 by saline waters, considering that the hypersaline stromatolites of Shark Bay comprise  
469 several archaeal species (Wong *et al.*, 2017, 2018), and it would be intriguing to identify  
470 whether salinity has an effect on the Archaeal composition of stromatolite-associated  
471 microbiota. However, as there are only two, low quality, non-conserved, relatively low-  
472 abundance genomes derived from Archaea, it is likely that this kingdom is less  
473 important in the stromatolites found at Cape Recife and Schoenmakerskop.

474

#### 475 **Key bacteria for stromatolite formation at Cape Recife and Schoenmakerskop**

476 Several bacterial groups may be key players in the formation of stromatolites in Cape  
477 Recife and Schoenmakerskop, with conserved bacterial species potentially acting as  
478 major contributors (Table 1). There were distinct functional abilities between the  
479 bacterial communities associated between the upper and middle formations. The  
480 consortia in the upper formations were dominated by conserved *Hydrococcus* and  
481 *Acaryochloris* species, which appeared to be capable of sulfate and sulfonate  
482 metabolism, whilst the middle formations were dominated primarily by conserved  
483 *Rivularia* species, which carry the genetic capacity to metabolize various forms of

484 phosphate substrates and potentially reduce nitrate. The lack of all genes required for  
485 phosphonate metabolism in *Rivularia* species in Schoenmakerskop Middle 2 (SM2) was  
486 unexpected but may be explained by the lower abundance of *Rivularia* in this sample,  
487 resulting in lower quality of genome (Table S3). Similarly, *Hydrococcus* bin CSU\_1\_8  
488 was of low quality (Table S3) and as a result appeared to be missing 3 of the genes  
489 required.

490

491 We propose the redox potential and solubility index in these stromatolites is potentially  
492 influenced by conserved bacteria generating sulfide (*Acaryochloris* and *Hydrococcus*  
493 species) and ammonia ions (*Rivularia* species) for the rapid precipitation of carbonate  
494 compounds and subsequent growth of stromatolite structures. The presence of  
495 *Microcoleus* species (Phormidiaceae family) and an unidentified genus of  
496 Phormidiaceae in both upper and middle formations is notable, as previous studies  
497 have found that lamellar precipitation of carbonate occurs on the filaments of cultured  
498 Phormidiaceae bacteria isolated from freshwater tufa structures (Payandi-Rolland *et al.*,  
499 2019). We further propose an abundance of alkaline phosphatases in several  
500 conserved species, as well as the abundance of genes associated with phosphonate  
501 degradation in *Rivularia* species, may result in increased local inorganic phosphate  
502 concentrations. This free inorganic phosphate may be incorporated into the phosphatic  
503 crusts observed in these stromatolites (Buttner *et al.*, 2019, unpublished).

504

505 The identification of conserved bacteria performing potentially important roles within  
506 stromatolites of both Cape Recife and Schoenmakerskop may provide insight into what

507 cyanobacterial species may have played a key role in the formation of ancient  
508 phosphatic stromatolites that formed in shallow marine and peritidal environments (Misi  
509 and Kyle, 1994; Drummond *et al.*, 2015; Buttner *et al.*, 2019, unpublished; Shiraishi *et*  
510 *al.*, 2019). However, transcriptomics, nutrient uptake and additional hydrochemistry  
511 would be required to determine if the proposed role of the conserved bacteria is valid.  
512 Similarly, future studies will be needed to determine whether physical (e.g. flow rate) or  
513 chemical factors (e.g. nutrient availability) result in our observed difference in functional  
514 potential between the different formations.

515

## 516 **EXPERIMENTAL PROCEDURES**

517 **Sample collection and DNA isolation.** Samples were collected from  
518 Schoenmakerskop (34°02'28.2"S 25°32'18.6"E) and Cape Recife (34°02'42.1"S  
519 25°34'07.5"E) at low tide, from the water surface level. Samples approximately 1cm  
520 deep were collected for 16S rRNA analysis in July 2019, from upper, middle and lower  
521 stromatolite formations (Fig. 1) in triplicate, approximately 1 cm apart. Sample cores for  
522 metagenomic shotgun sequencing were collected in April 2018, approximately 1cm  
523 deep, from upper, middle and lower stromatolite formations. Additional samples were  
524 collected in January 2018 from only the upper formations for metagenomic sequencing.  
525 All samples were stored in RNAlater and flash-frozen until delivery to the lab at which  
526 point, they were stored at -20 °C. DNA was extracted from ~1g of sample using Zymo  
527 quick DNA Fecal/Soil Microbe Miniprep Kit (Zymo Research, Cat No. D6010) according  
528 to the manufacturer's instructions.

529 **Amplicon sequence analysis.** Kapa HiFi Hotstart DNA polymerase (Roche, Cat No.  
530 KK2500) was used to generate amplicon libraries of the V4-V5 region of the 16s rRNA  
531 ribosomal subunit gene with the primer pair E517F (5'-GTAAGGTTTCYTCGCGT-3') and  
532 E969-984 (5'-CAGCAGCCGCGGTAA-3') (Matcher *et al.*, 2011) from triplicate samples  
533 using the following cycling parameters: Initial denaturation at 98 °C; 5 cycles (98 °C for  
534 45 seconds, 45 °C for 45 seconds and 72 °C for 1 minute); 18 cycles (98 °C for 45  
535 seconds, 50 °C for 30 seconds and 72 °C for 1 minute); final elongation step at 72 °C  
536 for 5 minutes. PCR products were purified using the Bioline Isolate II PCR and Gel kit  
537 (Bioline, Cat. No. BIO-52060). Samples were sequenced using the Illumina Miseq  
538 platform. Amplicon library datasets were processed and curated using the Mothur  
539 software platform (Schloss *et al.*, 2009). Sequences shorter than 200 nucleotides or  
540 containing ambiguous bases or homopolymeric runs greater than 7 were discarded.  
541 Sequences were classified using Naive-Bayesian classifier against the Silva database  
542 (v132) and VSEARCH software (Rognes *et al.*, 2016) was used to remove chimeras.  
543 Reads that were 97% similar were combined into operational taxonomic units (OTUs)  
544 using the Opticlust method (Westcott and Schloss, 2017). OTU abundance values were  
545 converted to relative values and the dataset was then transformed by square root and  
546 statistically analyzed using the Primer-e (V7) software package (Gorley and Clarke,  
547 2015). Reads were not classified against the Greengenes database, as the creators of  
548 Mothur warn against this practice, citing poor alignment quality in the variable regions.

549 **Metagenomic binning.** As 16S rRNA sequence analysis indicated that there was no  
550 statistical difference between triplicate samples, and that sample regions are therefore  
551 homogenous, a single sample from sites CRU, RU, RM1, RM2, RL, CSU, SU, SM1,



552 SM2 and SL (Fig.1) collected in January and April 2018 was used to prepare shotgun  
553 DNA libraries that were sequenced using IonTorrent Ion P1.1.17 Chip technology  
554 (Central Analytical Facilities, Stellenbosch University, South Africa). Adapters were  
555 trimmed and trailing bases (15 nts) were iteratively removed if the average quality score  
556 for the last 30 nts was lower than 16, which resulted in approximately 30–45 million  
557 reads per sample. Resultant metagenomic datasets were assembled into contiguous  
558 sequences (contigs) with SPAdes version 3.12.0 (Bankevich *et al.*, 2012) using the --  
559 iontorrent and --only-assembler options with kmer values of 21,33,55,77,99,127. The --  
560 iontorrent option enables a read error correction step performed by IonHammer,  
561 correcting homopolymeric runs inherent to IonTorrent sequencing chemistry (Ershov *et*  
562 *al.*, 2019).

563 **Quantification of metabolism-associated genes.** All raw data, count tables and  
564 scripts used to process the data can be accessed here:  
565 [https://github.com/samche42/Conserved\\_Stromatolite\\_bacteria\\_manuscript.git](https://github.com/samche42/Conserved_Stromatolite_bacteria_manuscript.git)

566 Contigs in each of the 10 samples were clustered into kingdom bins using Autometa  
567 (Miller *et al.*, 2019). Genes on all contigs within these bins were identified using Prodigal  
568 v.2.6.3 (Hyatt *et al.*, 2010). Genes were then annotated against the KEGG database  
569 using kofamscan (Aramaki *et al.*, 2019) with output in mapper format. Coverage  
570 corrected KO annotation counts were collected using kegg\_parser.py found in the  
571 GitHub repo listed above. Briefly, a dictionary of collection sites was made with all KO  
572 numbers supplied in a KEGG annotation query list (i.e. functional group). Kofamscan  
573 output per collection site was parsed and each time an entry matching that within the  
574 query list was found, a count for that annotation was increased by the coverage of the

575 contig on which it was located, resulting in a coverage-corrected count table of  
576 functional group KO annotations per collection site. In order to assess differences  
577 between collection sites, these values were transformed relative to average coverage  
578 per sample (weighted by contig length) using `weighted_contig_coverage_calculator.py`  
579 (see GitHub repo) according to Eq.1, where  $i$  is contig length and  $j$  is contig coverage.  
580 The abundances were then transformed using  $\log_2$  (Fig. 3).

581 **Equation 1.** Contig length weighted coverage =  $\sum ( (i / \sum(i)) \times j )$

582 Heatmaps for visualization of the data were created in R using the `tidyr`, `ggplot2` and  
583 `viridis` packages. Scripts can be found in the GitHub repo.

584 **Clustering of metagenomic data in genome bins.** Contigs were then clustered in  
585 putative genomic bins using Autometa  
586 ([https://bitbucket.org/jason\\_c\\_kwan/autometa/src/master/](https://bitbucket.org/jason_c_kwan/autometa/src/master/), Master branch, commit:  
587 a344c28) (Miller *et al.*, 2019). Bins were manually curated and resulted in 183 genomic  
588 bins. CheckM (Parks *et al.*, 2015) was used to assess bin purity and completion using  
589 default settings (Table S3). Approximately 37 genomes were of high quality, 75 were of  
590 medium quality and 71 were of low quality, in accordance with MIMAG standards  
591 defined by (Bowers *et al.*, 2017) (Table S3).

592 **Identification of conserved taxa.** Conservation of bacterial taxa was calculated using  
593 average nucleotide identities (ANIs) of all genomic bins, which were calculated in a  
594 pairwise manner using FastANI (Jain *et al.*, 2018). All genomic pairs sharing > 97% ANI  
595 were subset and considered conserved taxa. Percentage of mapped regions used to  
596 calculate ANI is reported in Table S2. Percentage of mapped regions is calculated as

597 the relative number of bidirectional fragments mapping to the total number of query  
598 fragments.

599 **Genome taxonomic classification.** Genomes were classified using the standalone  
600 GTDB-Tk tool (version 0.3.2) using the classify workflow and Genome Taxonomy  
601 Database version 89 (Parks *et al.*, 2019). The tool is unable to classify genomes less  
602 than 10% complete, as indicated in Table S3. The GTDB-Tk tool uses the Genome  
603 Taxonomy Database as a reference for classification, which is based on phylogeny  
604 inferred from concatenated protein alignments. This approach enabled the removal of  
605 polyphyletic groups and assignment of taxonomy from evolutionary divergence. The  
606 resulting taxonomy incorporates substantial changes in comparison to the NCBI  
607 taxonomy (Parks *et al.*, 2018). Equivalent NCBI taxonomic classifications have been  
608 provided for clarity in Table S3.

609 **Genome taxonomic clustering.** Phylogeny of bacterial genomes was inferred using  
610 JolyTree (Criscuolo, 2019) with a sketch size of 10 000 (Fig. 5 and Fig. S1). JolyTree  
611 infers phylogeny through computation of dissimilarity of kmer sketches, which is then  
612 transformed for the estimation of substitution events of the genomes' evolution  
613 (Criscuolo, 2019).

614 **Genome annotation.** Manually curated putative genomic bins were annotated using  
615 Prokka version 1.13 (Seemann, 2014), with GenBank compliance enabled. Protein-  
616 coding amino-acid sequences from genomic bins were annotated against the KEGG  
617 database using kofamscan (Aramaki *et al.*, 2019) with output in mapper format. KEGG  
618 orthologs were counted and processed as performed quantification of metabolism-

619 associated genes using kegg\_parser.py. Relative percentage of genes in individual  
620 genomes was calculated by dividing the contig-coverage corrected gene abundance per  
621 gene by the total contig-coverage corrected gene abundance for the sample from which  
622 it was binned (Fig. 5 and Fig. S1). E.g. The contig-coverage corrected gene abundance  
623 of *phoU* in genome bin CRU1\_1 was 3.52, and the total contig-coverage corrected gene  
624 abundance of *phoU* in the CRU metagenome sample was 29.90253 (See dataset  
625 Calculating\_rel\_perc.xlsx in GitHub repo). Therefore, the relative abundance of *phoU* in  
626 genome bin CRU1\_1 was:  $3.52/29.90 \times 100 = 11.79\%$  of total sample gene abundance.

627 **Archaeal genome binning and identification.** Contigs are classified within kingdom  
628 bins during Autometa binning. All contigs classified within the Archaea kingdom were  
629 given putative taxonomic assignments based on single-copy markers and clustered into  
630 bins. No bins could be acquired from the upper and middle formations from either  
631 collection site due to few or no contigs being of archaeal origin. Two genomes were  
632 obtained from the lower formation of each site respectively (Table S3). Genome quality  
633 was assessed using CheckM as described for bacterial bins. 16S rRNA and 23S rRNA  
634 sequences were extracted from each genome using barrnap 0.9  
635 (<https://github.com/tseemann/barrnap>) using the archaeal databases (23S: SILVA-LSU-  
636 Arc, 16S: RF01959) as reference. These sequences were then aligned against the nr  
637 database using BLASTn (Johnson *et al.*, 2008) for putative identification.

638 **Data availability.** Raw 16S rRNA gene amplicon sequence files were uploaded to the  
639 NCBI sequence read archive (SRA) database in BioProject PRJNA574289. Raw reads  
640 and binned genomes will be deposited in GenBank and respective accession numbers  
641 will be included in the accepted version of this manuscript.

642 **ACKNOWLEDGEMENTS**

643 The authors acknowledge Caro Damarjanaan who conducted a pilot study that informed  
644 this work. We also wish to thank Karthik Anantharaman (University of Wisconsin-  
645 Madison) for his helpful critique.

646

647 The authors acknowledge funding from the Gordon and Betty Moore Foundation (Grant  
648 number 6920) (awarded to R.A.D and J.C.K.), and grants awarded to R.A.D by the  
649 South African National Research Foundation (UID: 87583 and 109680). Development of  
650 Autometa in J.C.K.'s laboratory and contributions by E.R.R. were supported by the U.S.  
651 National Science Foundation (DBI-1845890). This research was performed in part using  
652 the computer resources and assistance of the UW-Madison Center for High Throughput  
653 Computing (CHTC) in the Department of Computer Sciences. The CHTC is supported  
654 by UW-Madison, the Advanced Computing Initiative, the Wisconsin Alumni Research  
655 Foundation, Wisconsin Institutes for Discovery, and the National Science Foundation  
656 and is an active member of the Open Science Grid, which is supported by the National  
657 Science Foundation and the U.S. Department of Energy's Office of Science. The  
658 authors also acknowledge the Center for High Performance Computing (CHPC, South  
659 Africa) for providing computing facilities for bioinformatics data analysis.

660

661 The authors declare no conflict of interests.

662

663

664 **REFERENCES**

665 Aguilar-Barajas, E., Díaz-Pérez, C., Ramírez-Díaz, M.I., Riveros-Rosas, H., and  
666 Cervantes, C. (2011) Bacterial transport of sulfate, molybdate, and related oxyanions.  
667 *Biometals* **24**: 687–707.

668 Allen, J.F. (2016) A Proposal for Formation of Archaean stromatolites before the advent  
669 of oxygenic photosynthesis. *Front Microbiol* **7**: 1784.

670 Aramaki, T., Blanc-Mathieu, R., Endo, H., Ohkubo, K., Kanehisa, M., Goto, S., and  
671 Ogata, H. (2019) KofamKOALA: KEGG ortholog assignment based on profile HMM and  
672 adaptive score threshold. *bioRxiv*. DOI: <https://doi.org/10.1101/602110>

673 Awramik, S.M. (1992) The History and Significance of Stromatolites. In, Schidlowski, M.,  
674 Golubic, S., Kimberley, M.M., McKirdy, D.M., and Trudinger, P.A. (eds), *Early Organic*  
675 *Evolution: Implications for Mineral and Energy Resources*. Berlin, Heidelberg: Springer  
676 Berlin Heidelberg, pp. 435–449.

677 Babilonia, J., Conesa, A., Casaburi, G., Pereira, C., Louyakis, A.S., Reid, R.P., and  
678 Foster, J.S. (2018) Comparative metagenomics provides insight into the ecosystem  
679 functioning of the Shark Bay Stromatolites, Western Australia. *Front Microbiol* **9**: 1359.

680 Balci, N., Gunes, Y., Sertcetin, E., and Kurt, M.A. (2018) Non-cyanobacterial community  
681 shape the stromatolites of Lake Salda, SW, Turkey. American Geophysical Union, Fall  
682 Meeting 2018, abstract #B43J-2972.

683 Bankevich, A., Nurk, S., Antipov, D., Gurevich, A.A., Dvorkin, M., Kulikov, A.S., et al.  
684 (2012) SPAdes: A new genome assembly algorithm and its applications to single-cell  
685 sequencing. *J Comput Biol* **19**: 455–477.

686 Bontognali, T.R.R., Sessions, A.L., Allwood, A.C., Fischer, W.W., Grotzinger, J.P.,  
687 Summons, R.E., and Eiler, J.M. (2012) Sulfur isotopes of organic matter preserved in

688 3.45-billion-year-old stromatolites reveal microbial metabolism. *Proc Natl Acad Sci U S*  
689 *A* **109**: 15146–15151.

690 Bowers, R.M., Kyrpides, N.C., Stepanauskas, R., Harmon-Smith, M., Doud, D., Reddy,  
691 T.B.K., et al. (2017) Minimum information about a single amplified genome (MISAG)  
692 and a metagenome-assembled genome (MIMAG) of bacteria and archaea. *Nat*  
693 *Biotechnol* **35**: 725–731.

694 Casaburi, G., Duscher, A.A., Pamela Reid, R., and Foster, J.S. (2016) Characterization  
695 of the stromatolite microbiome from Little Darby Island, The Bahamas using predictive  
696 and whole shotgun metagenomic analysis. *Environ Microbiol* **18**: 1452–1469.

697 Centeno, C.M., Mejía, O., and Falcón, L.I. (2016) Habitat conditions drive phylogenetic  
698 structure of dominant bacterial phyla of microbialite communities from different locations  
699 in Mexico. *Rev Biol Trop* **64**: 1057–1065.

700 Chaumeil, P.-A., Mussig, A.J., Hugenholtz, P., and Parks, D.H. (2019) GTDB-Tk: A  
701 toolkit to classify genomes with the Genome Taxonomy Database. *Bioinformatics*.  
702 btz848.

703 Cosmidis, J., Benzerara, K., Guyot, F., Skouri-Panet, F., Duprat, E., Férard, C., et al.  
704 (2015) Calcium-phosphate biomineralization induced by alkaline phosphatase activity in  
705 *Escherichia coli*: Localization, kinetics, and potential signatures in the fossil record.  
706 *Front Earth Sci* **3**: 84.

707 Criscuolo, A. (2019) A fast alignment-free bioinformatics procedure to infer accurate  
708 distance-based phylogenetic trees from genome assemblies. *Riogrande Odontol* **5**:  
709 e36178.

710 Danen-Louwerse, H.J., Lijklema, L., and Coenraats, M. (1995) Coprecipitation of

- 711 phosphate with calcium carbonate in Lake Veluwe. *Water Res* **29**: 1781–1785.
- 712 Dodd, C., Anderson, C.R., Perissinotto, R., du Plooy, S.J., and Rishworth, G.M. (2018)
- 713 Hydrochemistry of peritidal stromatolite pools and associated freshwater inlets along the
- 714 Eastern Cape coast, South Africa. *Sediment Geol* **373**: 163–179.
- 715 Drummond, J.B.R., Pufahl, P.K., Porto, C.G., and Carvalho, M. (2015) Neoproterozoic
- 716 peritidal phosphorite from the Sete Lagoas Formation (Brazil) and the Precambrian
- 717 phosphorus cycle. *Sedimentology* **62**: 1978–2008.
- 718 Dupraz, C., Reid, R.P., Braissant, O., Decho, A.W., Norman, R.S., and Visscher, P.T.
- 719 (2009) Processes of carbonate precipitation in modern microbial mats. *Earth-Sci Rev*
- 720 **96**: 141–162.
- 721 Dupraz, C., Visscher, P.T., Baumgartner, L.K., and Reid, R.P. (2004) Microbe-mineral
- 722 interactions: Early carbonate precipitation in a hypersaline lake (Eleuthera Island,
- 723 Bahamas). *Sedimentology* **51**: 745–765.
- 724 Ellis, H.R. (2011) Mechanism for sulfur acquisition by the alkanesulfonate
- 725 monooxygenase system. *Bioorg Chem* **39**: 178–184.
- 726 Ershov, V., Tarasov, A., Lapidus, A., and Korobeynikov, A. (2019) IonHammer:
- 727 Homopolymer-space hamming clustering for IonTorrent read error correction. *J Comput*
- 728 *Biol* **26**: 124–127.
- 729 Gallagher, K.L., Braissant, O., Kading, T.J., Dupraz, C., and Visscher, P.T. (2013)
- 730 Phosphate-related artifacts in carbonate mineralization experiments. *J Sediment Res*
- 731 **83**: 37–49.
- 732 Gallagher, K.L., Kading, T.J., Braissant, O., Dupraz, C., and Visscher, P.T. (2012)
- 733 Inside the alkalinity engine: The role of electron donors in the organomineralization



- 734 potential of sulfate-reducing bacteria. *Geobiology* **10**: 518–530.
- 735 Gleeson, D.B., Wacey, D., Waite, I., O'Donnell, A.G., and Kilburn, M.R. (2016)
- 736 Biodiversity of living, non-marine, thrombolites of Lake Clifton, Western Australia.
- 737 *Geomicrobiol J* **33**: 850–859.
- 738 Gorley, R.N. and Clarke, K.R. (2015) PRIMER v7: User Manual/Tutorial, Massey
- 739 University, Albany Campus.
- 740 Griffith, J.C. (2016) Insights into the soil microbial communities in New Zealand
- 741 indigenous tussock grasslands. (Thesis, Doctor of Philosophy). University of Otago.
- 742 Retrieved from <http://hdl.handle.net/10523/6906>
- 743 Guang-Can, T.A.O., Shu-Jun, T., Miao-Ying, C.A.I., and Guang-Hui, X.I.E. (2008)
- 744 Phosphate-solubilizing and-mineralizing abilities of bacteria isolated from soils.
- 745 *Pedosphere* **18**: 515–523.
- 746 Herrmann, M., Wegner, C.-E., Taubert, M., Geesink, P., Lehmann, K., Yan, L., et al.
- 747 (2019) Predominance of *Cand. Patescibacteria* in groundwater is caused by their
- 748 preferential mobilization from soils and flourishing under oligotrophic conditions. *Front*
- 749 *Microbiol* **10**: 1407.
- 750 Hyatt, D., Chen, G.-L., Locascio, P.F., Land, M.L., Larimer, F.W., and Hauser, L.J.
- 751 (2010) Prodigal: Prokaryotic gene recognition and translation initiation site identification.
- 752 *BMC Bioinformatics* **11**: 119.
- 753 Jain, C., Rodriguez-R, L.M., Phillippy, A.M., Konstantinidis, K.T., and Aluru, S. (2018)
- 754 High throughput ANI analysis of 90K prokaryotic genomes reveals clear species
- 755 boundaries. *Nat Commun* **9**: 5114.
- 756 Johnson, M., Zaretskaya, I., Raytselis, Y., Merezhuk, Y., McGinnis, S., and Madden,

- 757 T.L. (2008) NCBI BLAST: A better web interface. *Nucleic Acids Res* **36**: W5–9.
- 758 Kahnert, A., Vermeij, P., Wietek, C., James, P., Leisinger, T., and Kertesz, M.A. (2000)  
759 The ssu locus plays a key role in organosulfur metabolism in *Pseudomonas putida* S-  
760 313. *J Bacteriol* **182**: 2869–2878.
- 761 Kan, A.T., Fu, G., and Tomson, M.B. (2005) Adsorption and precipitation of an  
762 aminoalkylphosphonate onto calcite. *J Colloid Interface Sci* **281**: 275–284.
- 763 Keegan, K.P., Glass, E.M., and Meyer, F. (2016) MG-RAST, a metagenomics service  
764 for analysis of microbial community structure and function. *Microbial Environmental*  
765 *Genomics (MEG)* **1399**: 207–233.
- 766 Khodadad, C.L.M. and Foster, J.S. (2012) Metagenomic and metabolic profiling of  
767 nonlithifying and lithifying stromatolitic mats of Highborne Cay, the Bahamas. *PLoS One*  
768 **7**: e38229.
- 769 Konopacka-Łyskawa, D., Kościelska, B., Karczewski, J., and Gołąbiewska, A. (2017)  
770 The influence of ammonia and selected amines on the characteristics of calcium  
771 carbonate precipitated from calcium chloride solutions via carbonation. *Mater Chem*  
772 *Phys* **193**: 13–18.
- 773 Kurth, D., Amadio, A., Ordoñez, O.F., Albarracín, V.H., Gärtner, W., and Farías, M.E.  
774 (2017) Arsenic metabolism in high altitude modern stromatolites revealed by  
775 metagenomic analysis. *Sci Rep* **7**: 1024.
- 776 Lee, Y.S. and Park, W. (2019) Enhanced calcium carbonate-biofilm complex formation  
777 by alkali-generating *Lysinibacillus boronitolerans* YS11 and alkaliphilic *Bacillus* sp.  
778 AK13. *AMB Express* **9**: 49.
- 779 Macintyre, I.G., Prufert-Bebout, L., and Reid, R.P. (2000) The role of endolithic

780 cyanobacteria in the formation of lithified laminae in Bahamian stromatolites.  
781 *Sedimentology* **47**: 915–921.

782 Matcher, G.F., Dorrington, R.A., Henninger, T.O., and Froneman, P.W. (2011) Insights  
783 into the bacterial diversity in a freshwater-deprived permanently open Eastern Cape  
784 estuary, using 16S rRNA pyrosequencing analysis. *Water SA* **37.3**: 381 - 390.

785 Medina-Chávez, N.O., Viladomat-Jasso, M., Olmedo-Álvarez, G., Eguiarte, L.E., Souza,  
786 V., and De la Torre-Zavala, S. (2019) Diversity of Archaea domain in Cuatro Ciénegas  
787 Basin: Archaeal Domes. *bioRxiv* 766709. DOI: <https://doi.org/10.1101/766709>

788 Metcalf, W.W. and Wanner, B.L. (1993) Evidence for a fourteen-gene, *phnC* to *phnP*  
789 locus for phosphonate metabolism in *Escherichia coli*. *Gene* **129**: 27–32.

790 Miller, I.J., Rees, E.R., Ross, J., Miller, I., Baxa, J., Lopera, J., et al. (2019) Autometa:  
791 Automated extraction of microbial genomes from individual shotgun metagenomes.  
792 *Nucleic Acids Res* **47**: e57.

793 Misi, A. and Richard Kyle, J. (1994) Upper Proterozoic carbonate stratigraphy,  
794 diagenesis, and stromatolitic phosphorite formation, Irece Basin, Bahia, Brazil. *J*  
795 *Sediment Res* **64**: 299–310.

796 Mobberley, J.M., Khodadad, C.L.M., Visscher, P.T., Reid, R.P., Hagan, P., and Foster,  
797 J.S. (2015) Inner workings of thrombolites: Spatial gradients of metabolic activity as  
798 revealed by metatranscriptome profiling. *Sci Rep* **5**: 12601.

799 Moreno-Vivián, C., Cabello, P., Martínez-Luque, M., Blasco, R., and Castillo, F. (1999)  
800 Prokaryotic nitrate reduction: Molecular properties and functional distinction among  
801 bacterial nitrate reductases. *J Bacteriol* **181**: 6573–6584.

802 Nutman, A.P., Bennett, V.C., Friend, C.R.L., Van Kranendonk, M.J., and Chivas, A.R.

803 (2016) Rapid emergence of life shown by discovery of 3,700-million-year-old microbial  
804 structures. *Nature* **537**: 535–538.

805 Pace, A., Bourillot, R., Bouton, A., Vennin, E., Braissant, O., Dupraz, C., et al. (2018)  
806 Formation of stromatolite lamina at the interface of oxygenic-anoxygenic  
807 photosynthesis. *Geobiology* **16**: 378–398.

808 Parks, D.H., Chuvochina, M., Chaumeil, P.-A., Rinke, C., Mussig, A.J., and Hugenholtz,  
809 P. (2019) Selection of representative genomes for 24,706 bacterial and archaeal  
810 species clusters provide a complete genome-based taxonomy. *bioRxiv* 771964. DOI:  
811 <https://doi.org/10.1101/771964>

812 Parks, D.H., Chuvochina, M., Waite, D.W., Rinke, C., Skarszewski, A., Chaumeil, P.-A.,  
813 and Hugenholtz, P. (2018) A standardized bacterial taxonomy based on genome  
814 phylogeny substantially revises the tree of life. *Nat Biotechnol* **36**: 996–1004.

815 Parks, D.H., Imelfort, M., Skennerton, C.T., Hugenholtz, P., and Tyson, G.W. (2015)  
816 CheckM: Assessing the quality of microbial genomes recovered from isolates, single  
817 cells, and metagenomes. *Genome Res* **25**: 1043–1055.

818 Payandi-Rolland, D., Roche, A., Vennin, E., Visscher, P.T., Amiotte-Suchet, P.,  
819 Thomas, C., and Bundeleva, I.A. (2019) Carbonate precipitation in mixed cyanobacterial  
820 biofilms forming freshwater microbial tufa. *Minerals* **9**: 409.

821 Perissinotto, R., Bornman, T.G., Steyn, P.-P., Miranda, N.A.F., Dorrington, R.A.,  
822 Matcher, G.F., et al. (2014) Tufa stromatolite ecosystems on the South African south  
823 coast. *S Afr J Sci* **110**: 01–08.

824 Ragot, S.A., Kertesz, M.A., and Bünemann, E.K. (2015) *phoD* Alkaline phosphatase  
825 gene diversity in soil. *Appl Environ Microbiol* **81**: 7281–7289.

826 Ragot, S.A., Kertesz, M.A., Mészáros, É., Frossard, E., and Bünemann, E.K. (2017) Soil  
827 *phoD* and *phoX* alkaline phosphatase gene diversity responds to multiple environmental  
828 factors. *FEMS Microbiol Ecol* **93**: fiw212

829 Reid, R.P., Visscher, P.T., Decho, A.W., Stolz, J.F., Bebout, B.M., Dupraz, C., et al.  
830 (2000) The role of microbes in accretion, lamination and early lithification of modern  
831 marine stromatolites. *Nature* **406**: 989–992.

832 Rishworth, G.M., Cawthra, H.C., Dodd, C., and Perissinotto, R. (2019) Peritidal  
833 stromatolites as indicators of stepping-stone freshwater resources on the Palaeo-  
834 Agulhas Plain landscape. *Quat Sci Rev* 105704.

835 Rishworth, G.M., van Elden, S., Perissinotto, R., Miranda, N.A.F., Steyn, P.-P., and  
836 Bornman, T.G. (2016) Environmental influences on living marine stromatolites: Insights  
837 from benthic microalgal communities. *Environ Microbiol* **18**: 503–513.

838 Rishworth, G.M., Perissinotto, R., Bird, M.S., and Pelletier, N. (2018) Grazer responses  
839 to variable macroalgal resource conditions facilitate habitat structuring. *R Soc Open Sci*  
840 **5**: 171428.

841 Rishworth, G.M., Perissinotto, R., Bird, M.S., Strydom, N.A., Peer, N., Miranda, N.A.F.,  
842 and Raw, J.L. (2017) Non-reliance of metazoans on stromatolite-forming microbial mats  
843 as a food resource. *Sci Rep* **7**: 42614.

844 Rishworth, G.M., Perissinotto, R., Bornman, T.G., and Lemley, D.A. (2017) Peritidal  
845 stromatolites at the convergence of groundwater seepage and marine incursion:  
846 Patterns of salinity, temperature and nutrient variability. *J Mar Syst* **167**: 68–77.

847 Rodriguez-Navarro, C., Rodriguez-Gallego, M., Ben Chekroun, K., and Gonzalez-  
848 Muñoz, M.T. (2003) Conservation of ornamental stone by *Myxococcus xanthus*-induced

849 carbonate biomineralization. *Appl Environ Microbiol* **69**: 2182–2193.

850 Rognes, T., Flouri, T., Nichols, B., Quince, C., and Mahé, F. (2016) VSEARCH: A  
851 versatile open source tool for metagenomics. *PeerJ* **4**: e2584.

852 Rott, E., Steinmetz, H., and Metzger, J.W. (2018) Organophosphonates: A review on  
853 environmental relevance, biodegradability and removal in wastewater treatment plants.  
854 *Sci Total Environ* **615**: 1176–1191.

855 Ruvindy, R., White, R.A., 3rd, Neilan, B.A., and Burns, B.P. (2016) Unravelling core  
856 microbial metabolisms in the hypersaline microbial mats of Shark Bay using high-  
857 throughput metagenomics. *ISME J* **10**: 183–196.

858 Santos, A.A., Venceslau, S.S., Grein, F., Leavitt, W.D., Dahl, C., Johnston, D.T., and  
859 Pereira, I.A.C. (2015) A protein trisulfide couples dissimilatory sulfate reduction to  
860 energy conservation. *Science* **350**: 1541–1545.

861 Schloss, P.D., Westcott, S.L., Ryabin, T., Hall, J.R., Hartmann, M., Hollister, E.B., et al.  
862 (2009) Introducing mothur: Open-source, platform-independent, community-supported  
863 software for describing and comparing microbial communities. *Appl Environ Microbiol*  
864 **75**: 7537–7541.

865 Seemann, T. (2014) Prokka: Rapid prokaryotic genome annotation. *Bioinformatics* **30**:  
866 2068–2069.

867 Shiraishi, F., Ohnishi, S., Hayasaka, Y., Hanzawa, Y., Takashima, C., Okumura, T., and  
868 Kano, A. (2019) Potential photosynthetic impact on phosphate stromatolite formation  
869 after the Marinoan glaciation: Paleoceanographic implications. *Sediment Geol* **380**: 65–  
870 82.

871 Smith, A., Cooper, A., Misra, S., Bharuth, V., Guastella, L., and Botes, R. (2018) The

- 872 extant shore platform stromatolite (SPS) facies association: A glimpse into the  
873 Archean? *Biogeosciences* **15**: 2189–2203.
- 874 Soo, R.M., Hemp, J., Parks, D.H., Fischer, W.W., and Hugenholtz, P. (2017) On the  
875 origins of oxygenic photosynthesis and aerobic respiration in Cyanobacteria. *Science*  
876 **355**: 1436–1440.
- 877 Stasi, R., Neves, H.I., and Spira, B. (2019) Phosphate uptake by the phosphonate  
878 transport system PhnCDE. *BMC Microbiol* **19**: 79.
- 879 Stüeken, E.E. (2016) Nitrogen in ancient mud: A biosignature? *Astrobiology* **16**: 730–  
880 735.
- 881 Thomazo, C., Ader, M., and Philippot, P. (2011) Extreme <sup>15</sup>N-enrichments in 2.72-Gyr-  
882 old sediments: Evidence for a turning point in the nitrogen cycle. *Geobiology* **9**: 107–  
883 120.
- 884 Visscher, P.T., Pamela Reid, R., and Bebout, B.M. (2000) Microscale observations of  
885 sulfate reduction: Correlation of microbial activity with lithified micritic laminae in modern  
886 marine stromatolites. *Geology* **28**: 919–922.
- 887 Visscher, P.T. and Stolz, J.F. (2005) Microbial mats as bioreactors: Populations,  
888 processes, and products. In, Noffke, N. (ed), *Geobiology: Objectives, Concepts,*  
889 *Perspectives*. Amsterdam: Elsevier, pp. 87–100.
- 890 Warden, J.G., Casaburi, G., Omelon, C.R., Bennett, P.C., Breecker, D.O., and Foster,  
891 J.S. (2016) Characterization of microbial mat microbiomes in the modern thrombolite  
892 ecosystem of Lake Clifton, Western Australia using shotgun metagenomics. *Front*  
893 *Microbiol* **7**: 1064.
- 894 Wei, S., Cui, H., Jiang, Z., Liu, H., He, H., and Fang, N. (2015) Biomineralization

895 processes of calcite induced by bacteria isolated from marine sediments. *Braz J*  
896 *Microbiol* **46**: 455–464.

897 Westcott, S.L. and Schloss, P.D. (2017) OptiClust, an improved method for assigning  
898 amplicon-based sequence data to operational taxonomic units. *mSphere* **2**: e00073-17.

899 White, A.K. and Metcalf, W.W. (2007) Microbial metabolism of reduced phosphorus  
900 compounds. *Annu Rev Microbiol* **61**: 379–400.

901 White, R.A., Chan, A.M., Gavelis, G.S., Leander, B.S., Brady, A.L., Slater, G.F., et al.  
902 (2016) Metagenomic analysis suggests modern freshwater microbialites harbor a  
903 distinct core microbial community. *Front Microbiol* **6**: 1531.

904 Witze, A. (2016) Claims of Earth's oldest fossils tantalize researchers. *Nature News*.  
905 DOI:10.1038/nature.2016.20506

906 Wong, H.L., Visscher, P.T., White, R.A., III, Smith, D.-L., Patterson, M.M., and Burns,  
907 B.P. (2017) Dynamics of archaea at fine spatial scales in Shark Bay mat microbiomes.  
908 *Sci Rep* **7**: 46160.

909 Wong, H.L., White, R.A., Visscher, P.T., Charlesworth, J.C., Vázquez-Campos, X., and  
910 Burns, B.P. (2018) Disentangling the drivers of functional complexity at the  
911 metagenomic level in Shark Bay microbial mat microbiomes. *ISME J* **12**: 2619–2639.

912 Wood, S.A., Depree, C., Brown, L., McAllister, T., and Hawes, I. (2015) Entrapped  
913 sediments as a source of phosphorus in epilithic cyanobacterial proliferations in low  
914 nutrient rivers. *PLoS One* **10**: e0141063.

915 Yang, J., Junium, C.K., Grassineau, N.V., Nisbet, E.G., Izon, G., Mettam, C., et al.  
916 (2019) Ammonium availability in the Late Archaean nitrogen cycle. *Nature Geoscience*  
917 **12**: 553–557.



918 Zaheer, R., Morton, R., Proudfoot, M., Yakunin, A., and Finan, T.M. (2009) Genetic and  
919 biochemical properties of alkaline phosphatases phoX family protein found in many  
920 bacteria. *Environ Microbiol* **11**: 1572–1587.

921

## 922 **TABLE AND FIGURE LEGENDS**

923 **Figure 1.** Stromatolites were collected from four different points at two different sites  
924 along the SA coastline. (A) Aerial view of sampling locations within the  
925 Schoenmakerskop site and (B) the Cape Recife site. Contour lines represent elevation  
926 at 5cm increments. Samples were collected from upper, middle and lower formations.  
927 The boundaries of which are indicated with a dotted blue line. (C - D) A 3-dimensional  
928 rendering of the sample sites at Schoenmakerskop and Cape Recife respectively  
929 constructed by a 3rd party (Caelum Technologies<sup>®</sup>) using a combination of drone-based  
930 photogrammetry and geographic mapping using differential GPS. Samples were  
931 collected from upper, middle and lower formations; the boundaries of which are  
932 indicated with a dotted blue line. Abbreviations are as follows: CSU: Schoenmakerskop  
933 Upper Jan SU: Schoenmakerskop Upper April, CRU: Cape Recife Upper (Jan), RU:  
934 Cape Recife Upper (April), SM1: Schoenmakerskop Middle 1 (April), SM2:  
935 Schoenmakerskop Middle 2 (April), RM1: Cape Recife Middle 1 (April), RM2: Cape  
936 Recife Middle 1 (April), SL: Schoenmakerskop Lower (April), RL: Cape Recife Lower  
937 (April).

938

939 **Figure 2.** Distribution and abundance of bacterial taxa in stromatolite formations based  
940 on 16S rRNA gene fragment amplicon libraries. (A) Phylogenetic classification and

941 average relative abundance (n=3) of dominant phyla in different sample sites indicated  
942 that all stromatolite samples are dominated by Cyanobacteria, Bacteroidetes, Alpha-  
943 and Gammaproteobacteria. (B) OTU abundance was used to cluster stromatolite  
944 biological replicates using Bray-Curtis non-dimensional scaling and showed statistically  
945 significant clustering of replicate samples from each of the sampled regions. Samples  
946 were isolated from upper (green), middle (red) and lower (blue) stromatolites formations  
947 in Cape Recife (triangles) and Schoenmakerskop (circles).

948

949 **Figure 3.** Summary of phosphate, nitrogen and sulfate transport and metabolism genes  
950 in overall metagenomic data from stromatolites in Schoenmakerskop and Cape Recife  
951 upper, middle and lower formations respectively. Gene abundance is expressed relative  
952 to the length-weighted average contig coverage per sample and transformed using log<sub>2</sub>  
953 scaling. Note: On the color scale, grey indicates genes which were not detected in the  
954 respective sample. Abbreviations are as follows: CSU: Schoenmakerskop Upper Jan  
955 SU: Schoenmakerskop Upper April, CRU: Cape Recife Upper (Jan), RU: Cape Recife  
956 Upper (April), SM1: Schoenmakerskop Middle 1 (April), SM2: Schoenmakerskop Middle  
957 2 (April), RM1: Cape Recife Middle 1 (April), RM2: Cape Recife Middle 1 (April), SL:  
958 Schoenmakerskop Lower (April), RL: Cape Recife Lower (April).

959

960 **Figure 4.** Taxonomic classification of putative genome bins in stromatolites collected  
961 from upper/inflow, middle and lower/marine formations of Schoenmakerskop and Cape  
962 Recife. Coverage per genome has been used as a proxy for abundance and used to  
963 scale the size of individual genome bars, expressed as a percentage of the sum of all

964 genome bin coverages. (A) The coverage of conserved (diagonal lines) and non-  
965 conserved (solid colors) bacterial genomes. Taxonomic classification of each genome is  
966 indicated by color. (B). Taxonomic classifications of conserved bacterial species in each  
967 of the samples, generated with GTDB-Tk (Chaumeil *et al.*, 2019).

968

969 **Figure 5.** Summary of phosphate, nitrogen and sulfate transport and metabolism genes  
970 in conserved genomes from bacteria associated with stromatolites in Schoenmakerskop  
971 and Cape Recife upper, middle and lower formations respectively. Relative gene  
972 abundance per sample is indicated using a gradient color scale. Relative gene  
973 abundance was calculated by dividing coverage-corrected gene abundance in each  
974 genome by the coverage-corrected gene abundance from the metagenomic sample  
975 from which it came. CSU: Schoenmakerskop Upper Jan SU: Schoenmakerskop Upper  
976 April, CRU: Cape Recife Upper (Jan), RU: Cape Recife Upper (April), SM1:  
977 Schoenmakerskop Middle 1 (April), SM2: Schoenmakerskop Middle 2 (April), RM1:  
978 Cape Recife Middle 1 (April), RM2: Cape Recife Middle 1 (April), SL: Schoenmakerskop  
979 Lower (April), RL: Cape Recife Lower (April).

980

981 **Figure S1.** Relative abundance of phosphate, nitrogen and sulfate transport and  
982 metabolism genes per genome relative to total gene abundance per sample from  
983 Schoenmakerskop and Cape Recife upper, middle and lower formations. Relative gene  
984 abundance per sample is indicated using a gradient color scale. Relative gene  
985 abundance was calculated by dividing coverage-corrected gene abundance in each  
986 genome by the coverage-corrected gene abundance from the metagenomic sample

987 from which it came. CSU: Schoenmakerskop Upper Jan SU: Schoenmakerskop Upper  
988 April, CRU: Cape Recife Upper (Jan), RU: Cape Recife Upper (April), SM1:  
989 Schoenmakerskop Middle 1 (April), SM2: Schoenmakerskop Middle 2 (April), RM1:  
990 Cape Recife Middle 1 (April), RM2: Cape Recife Middle 1 (April), SL: Schoenmakerskop  
991 Lower (April), RL: Cape Recife Lower (April).

992

993 **Table 1.** Conserved bacterial species (ANI > 97%) and their functional potential across  
994 upper, middle and lower stromatolite formations at Cape Recife and Schoenmakerskop.

995

996 **Table S1.** Summary of genomes binned per collected stromatolite sample

997

998 **Table S2.** Conserved bacterial species defined by shared ANI greater than 97% in  
999 stromatolite formations from Cape Recife and Schoenmakerskop.

1000

1001 **Table S3.** Summary of characteristics and taxonomic classifications of genomes binned  
1002 from shotgun metagenomic data from sampled upper, middle and lower stromatolite  
1003 formations from Cape Recife and Schoenmakerskop. Bacterial bins are listed first, with  
1004 the two archaeal bins listed at the bottom.



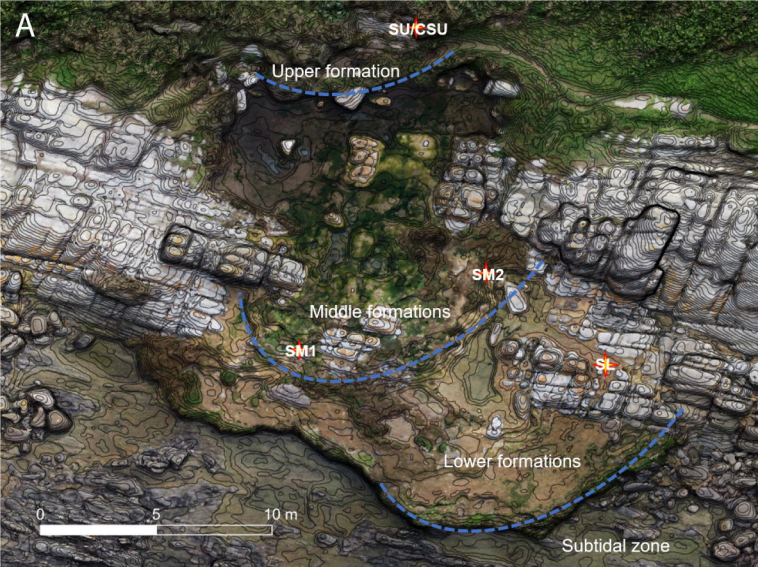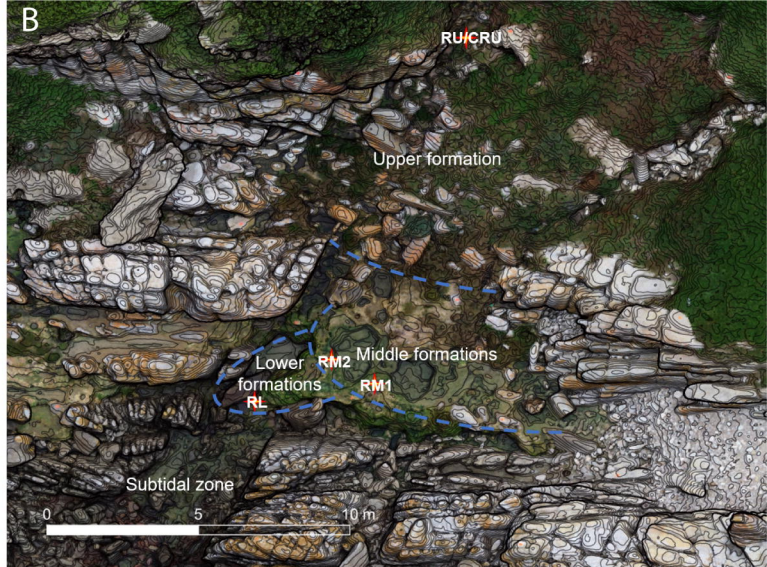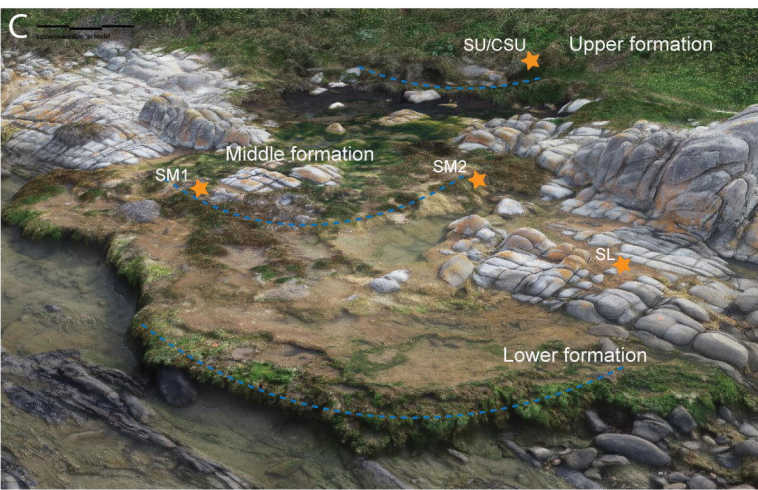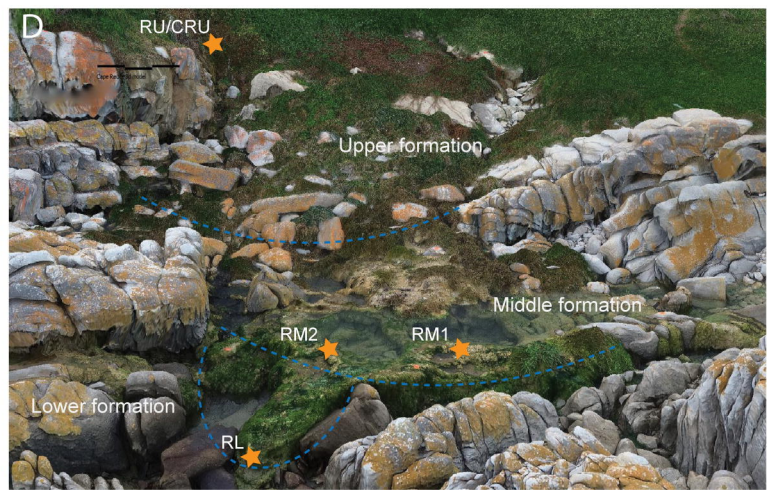

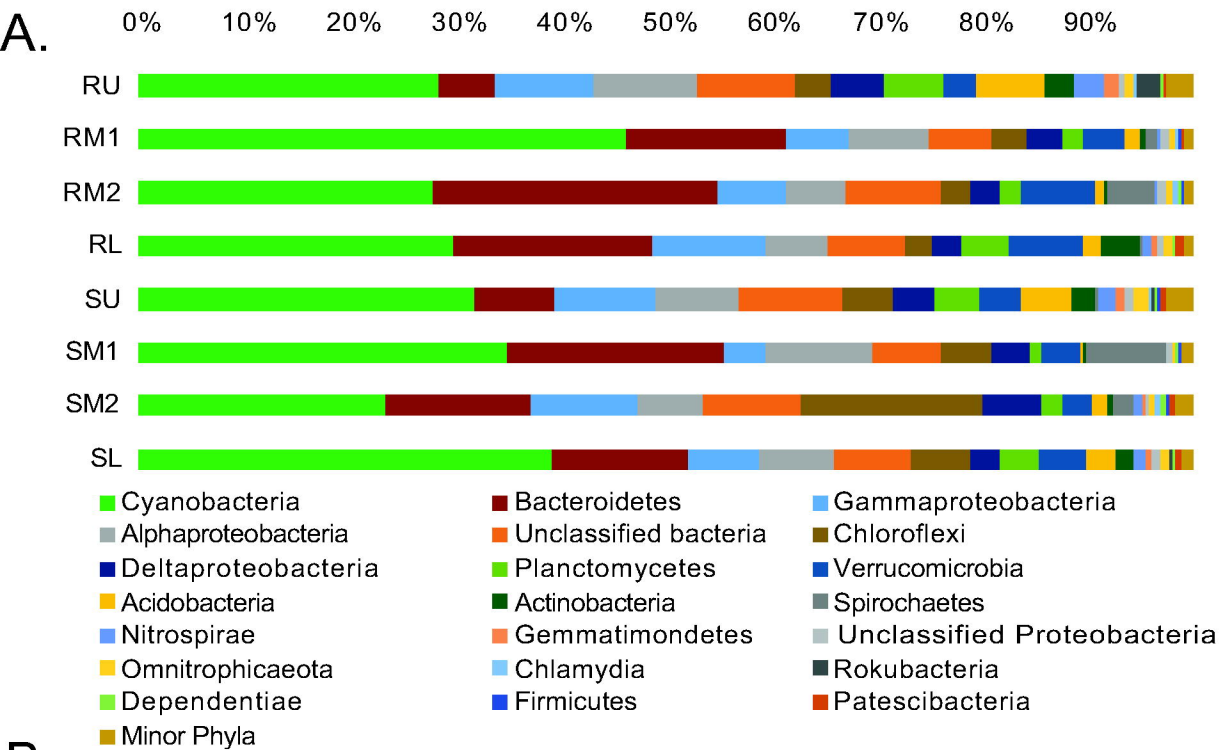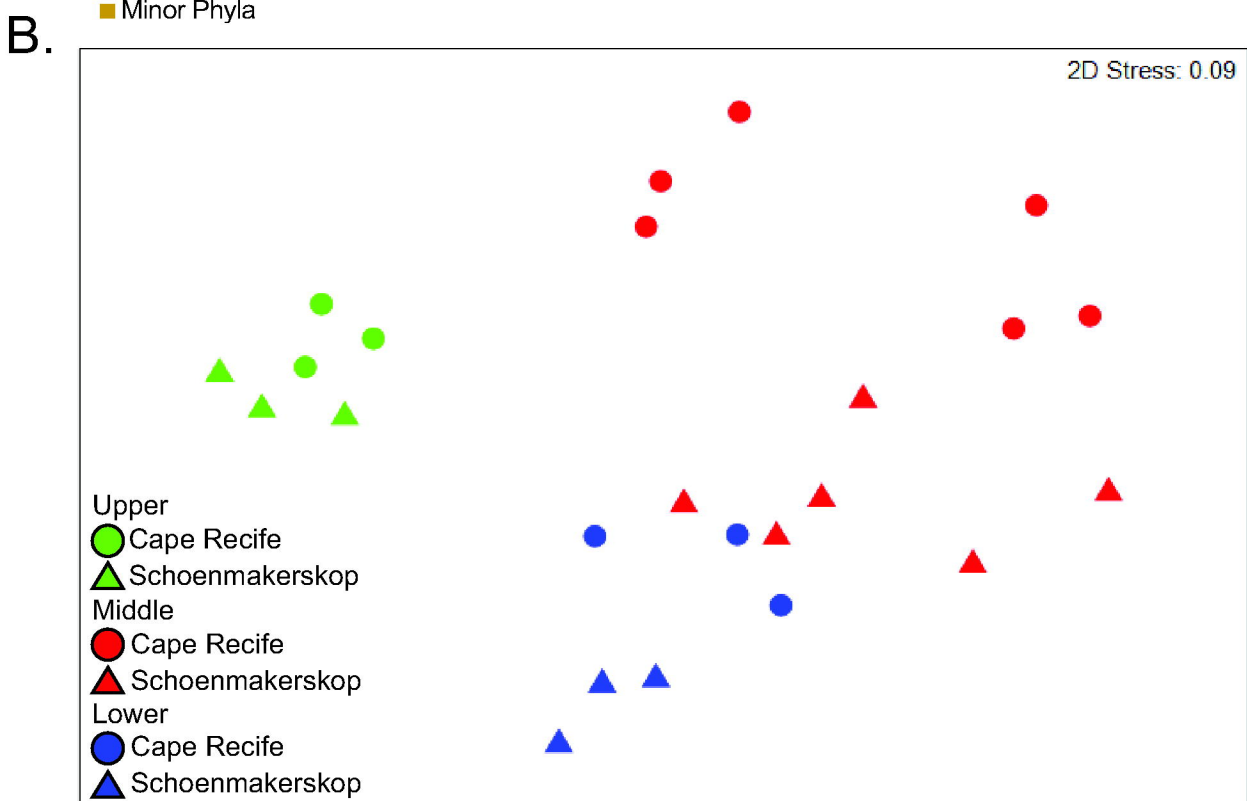



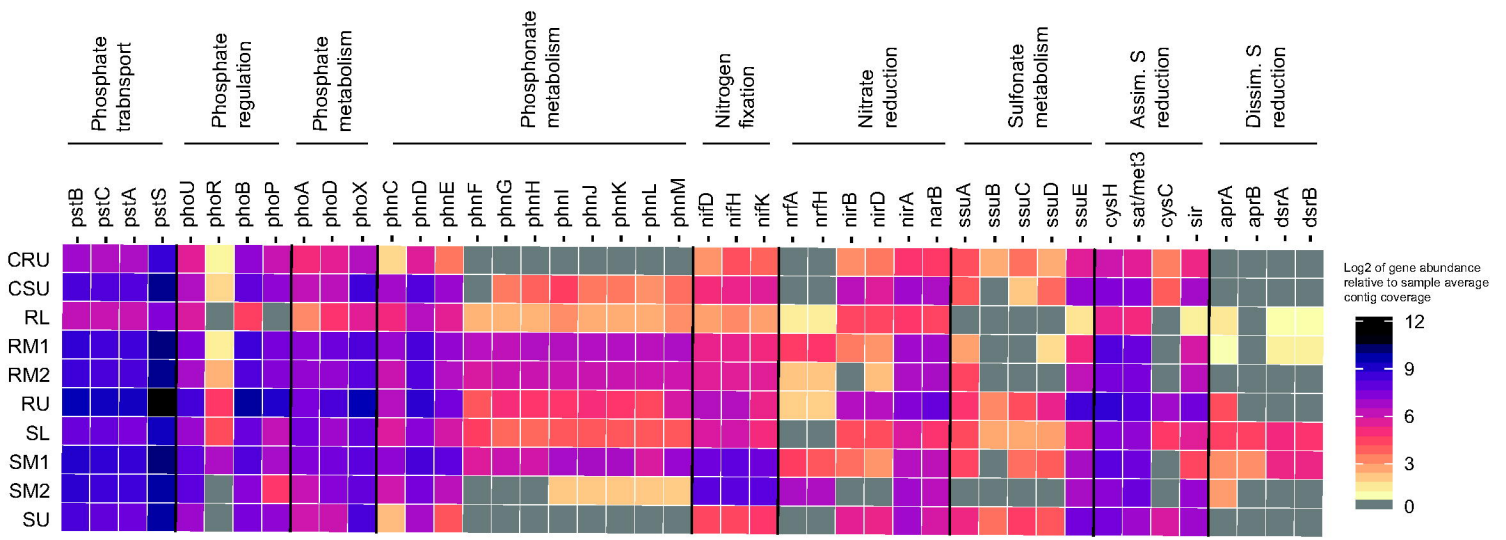

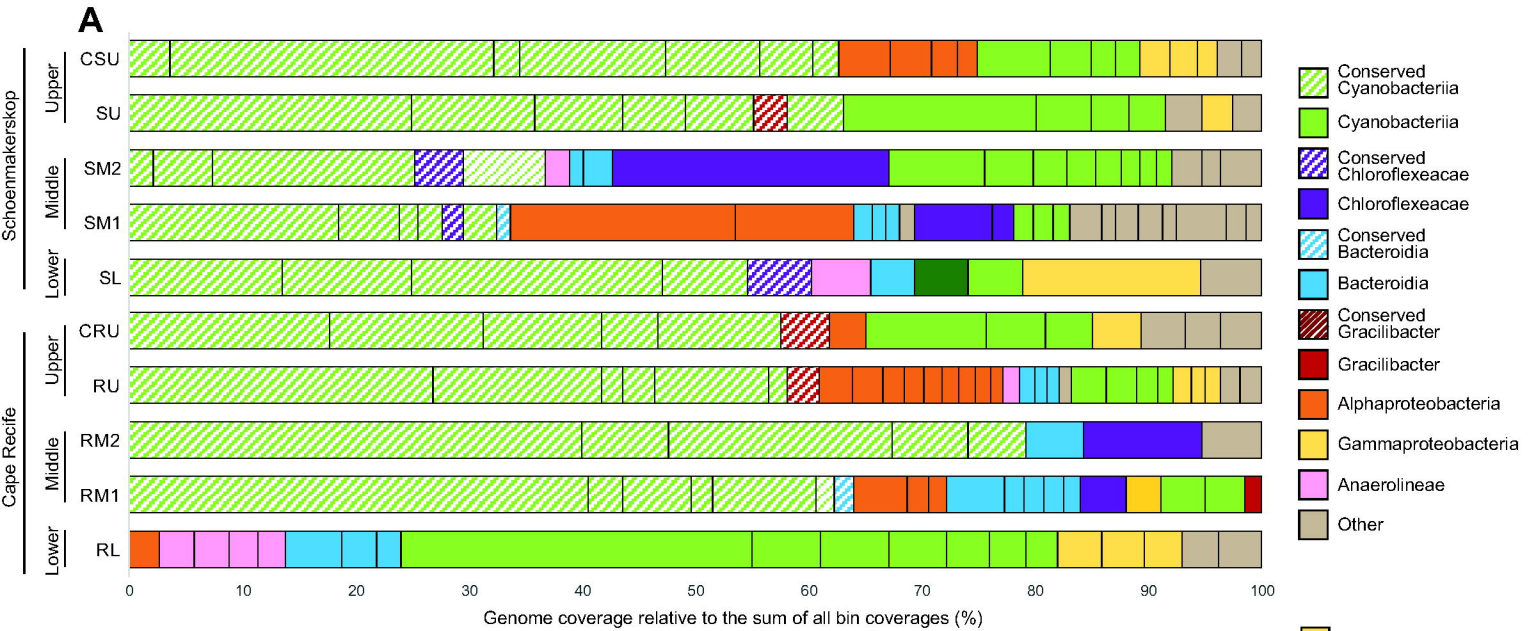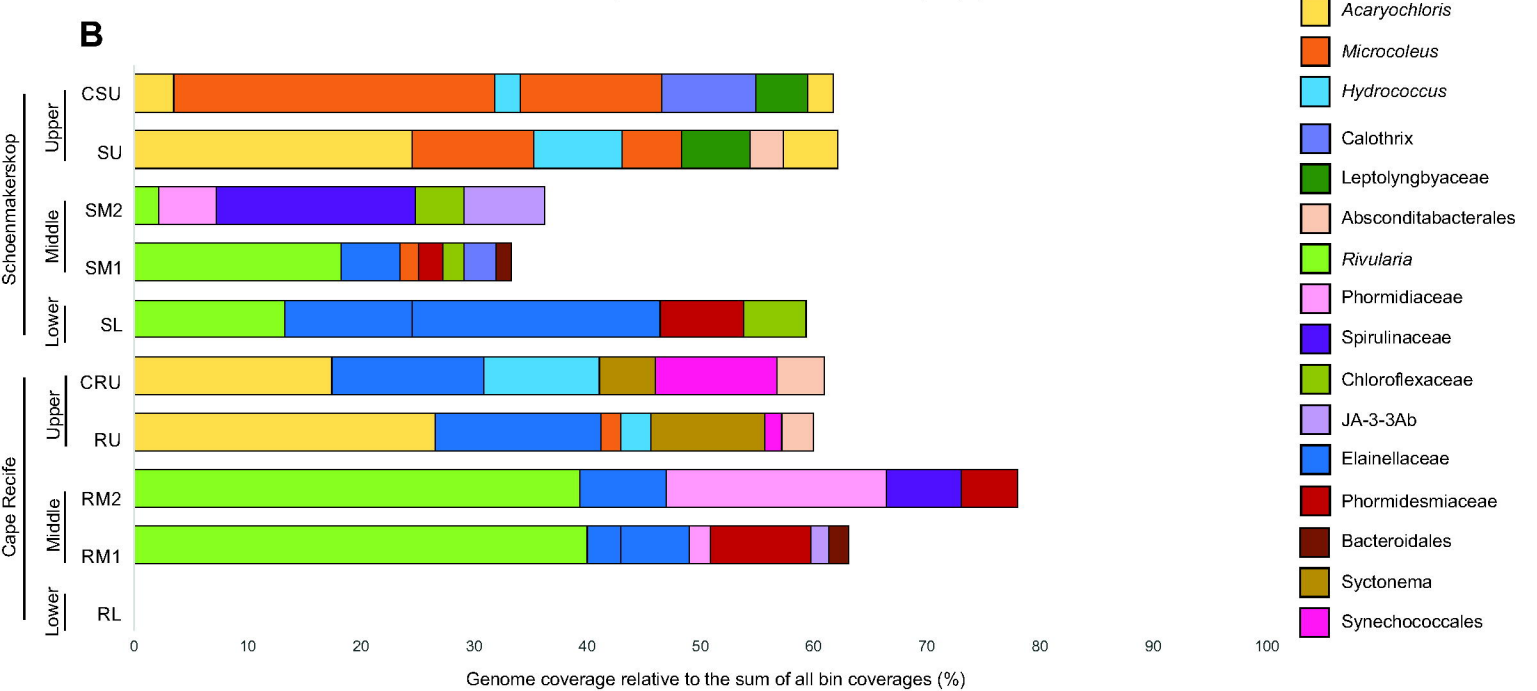



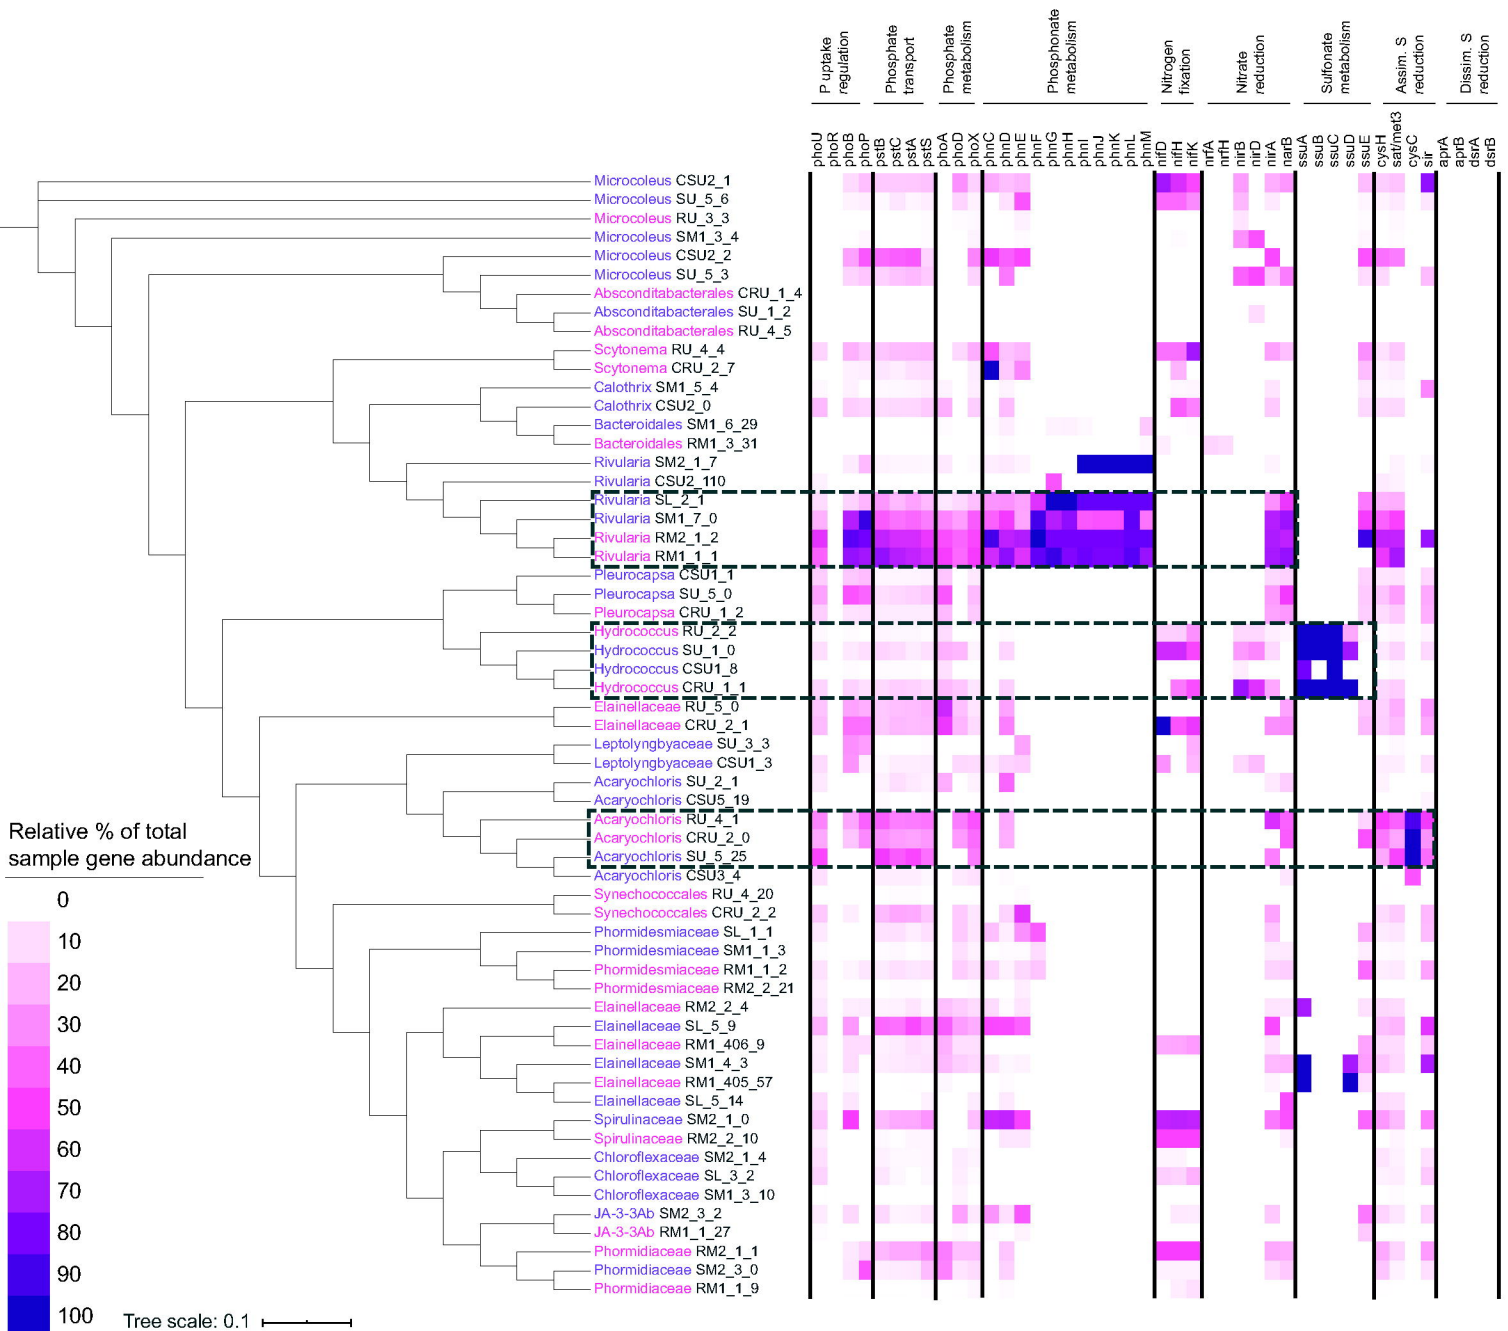

Source: https://www.biorxiv.org/content/10.1101/818625v2.full.pdf
