# Supplementary material for: Conserved bacterial genomes from two geographically distinct peritidal stromatolite formations shed light on potential functional guilds
Source: bioRxiv or medRxiv preprint supplement (doi:10.1101/818625), 2020-03-14
Supplement: Supplementary file [file media-4.pdf]

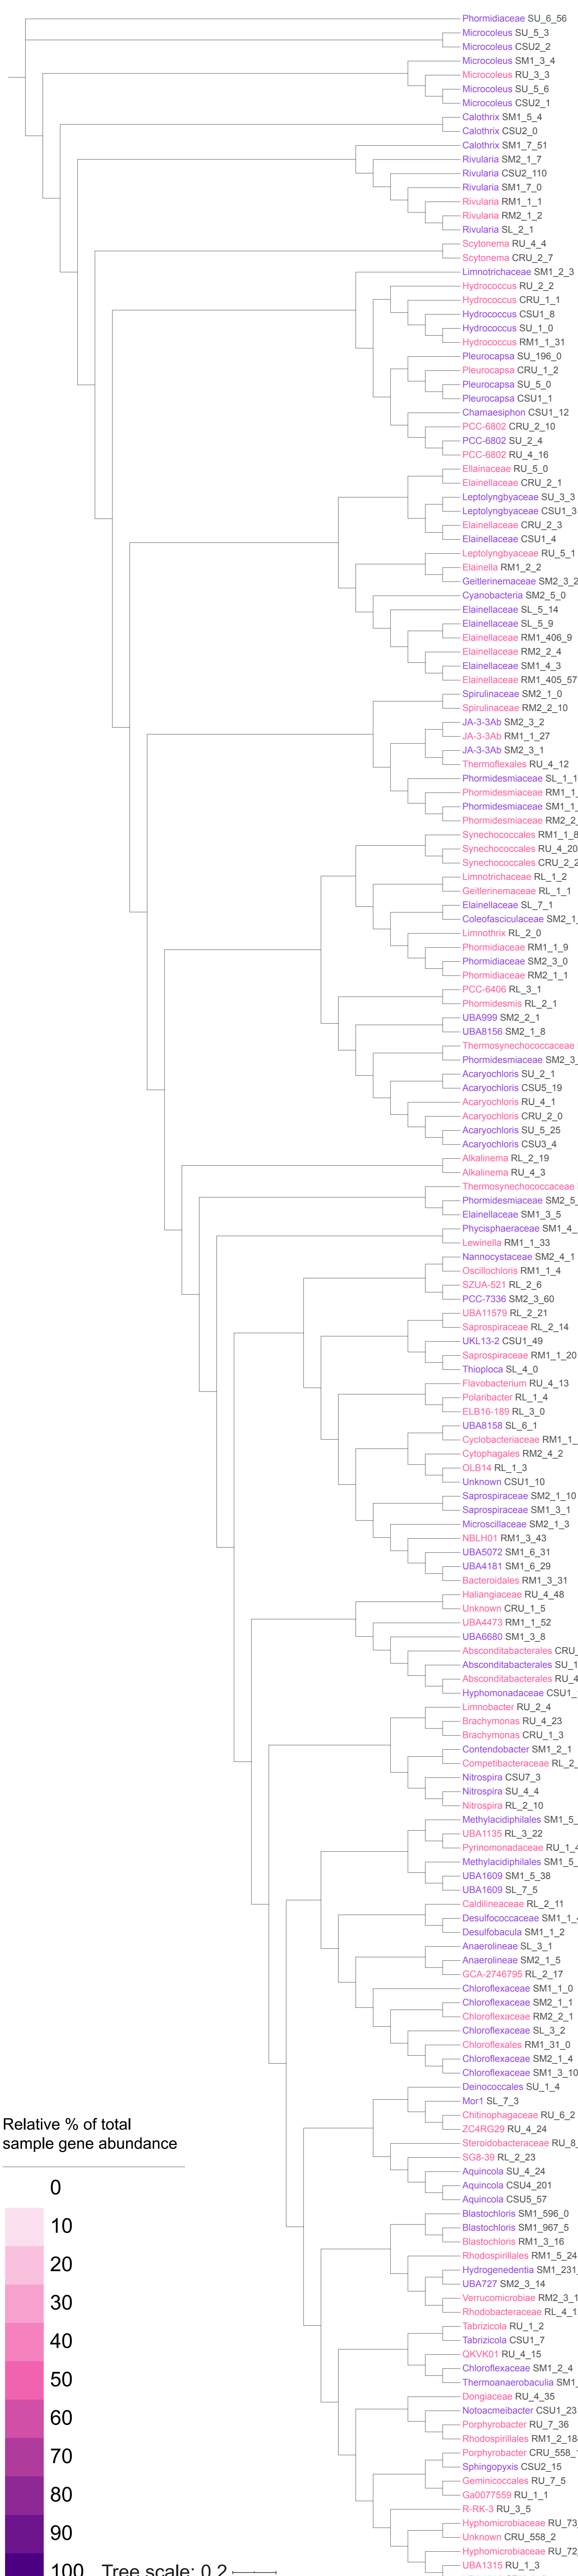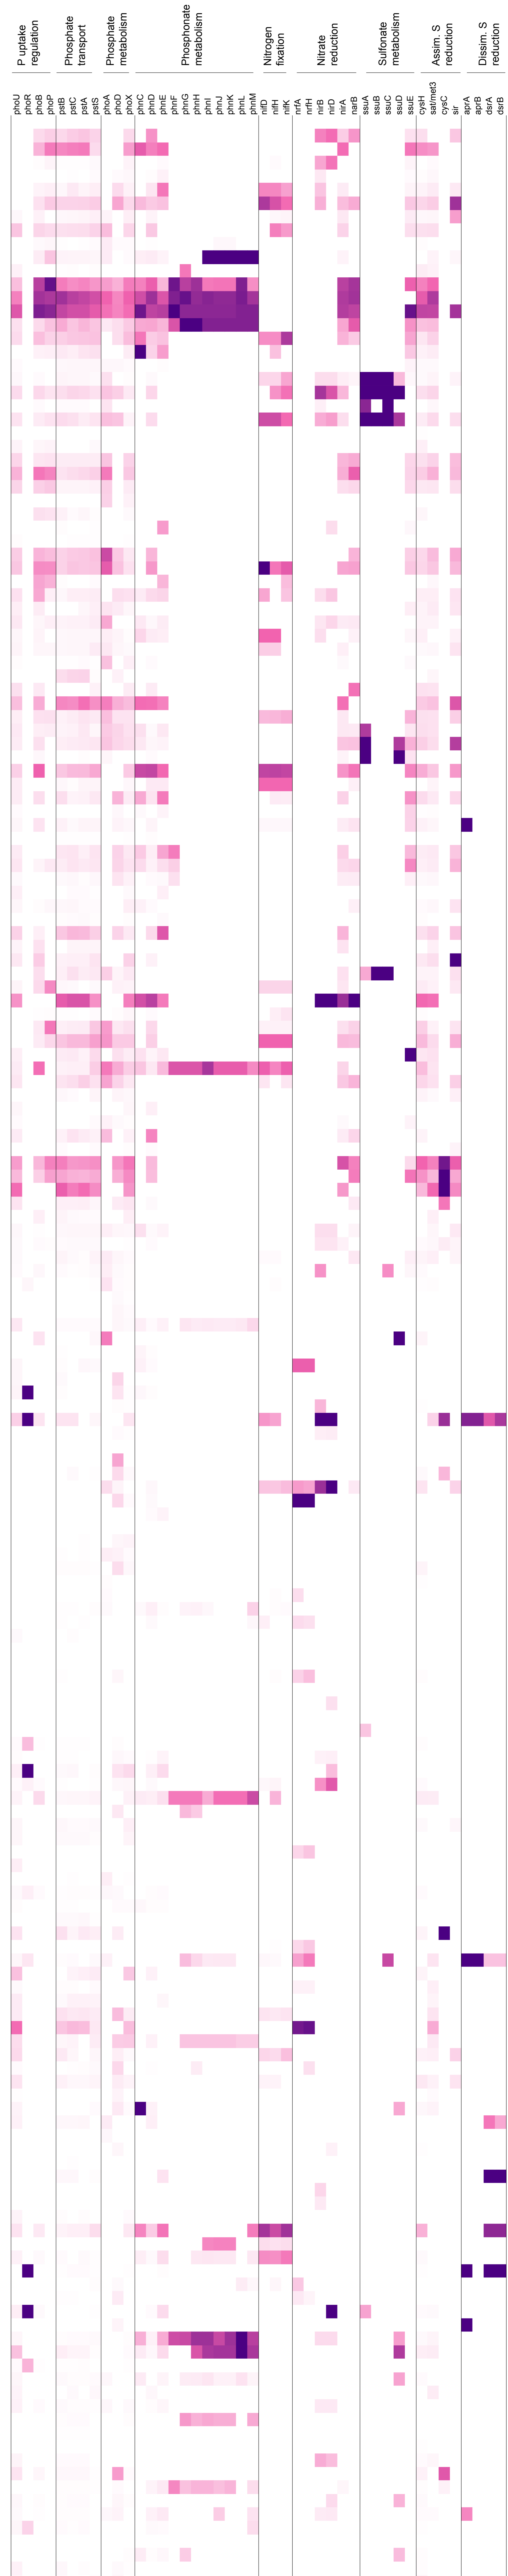

Relative % of total sample gene abundance

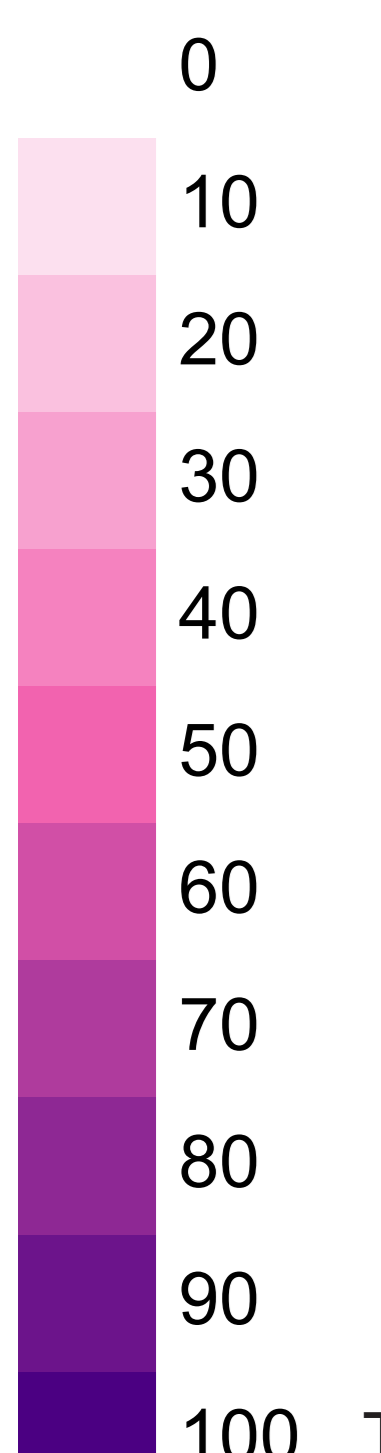

Tree scale: 0.2
